# Supplementary material
Source: PubMed Central journal article supplement (PMC8404304)
Supplement: NIHMS1695113-supplement-Supplementary_File_2.pdf [file NIHMS1695113-supplement-Supplementary_File_2.pdf]

# Transcriptome-wide association study, variant prioritization and colocalization analysis

## CONTENTS

|                                                                                                                                                                                    |    |
|------------------------------------------------------------------------------------------------------------------------------------------------------------------------------------|----|
| Table1: S-MultiXcan results for genes that were Bonferroni significant ( $1.79E-07$ ) for cross-tissue QTL sharing (1,2).....                                                      | 2  |
| Table 2: SNPs that were prioritized using finemapping and functional annotation (CADD scores)(3).....                                                                              | 13 |
| Table 3: Positional gene annotation of prioritized SNPs using $\pm 100$ kb window (4) .....                                                                                        | 14 |
| Table 4: Colocalization analysis of genes and their specific tissue pairs (as reported from MetaXcan) which overlapped with genes identified from variant prioritization (5) ..... | 19 |
| Figures of genes with $H_4$ probability of $>\sim 80\%$ .....                                                                                                                      | 21 |

**Table1: S-MultiXcan results for genes that were Bonferroni significant (1.79E-07) for cross-tissue QTL sharing (1,2)**

| GENE                      | GENE_NAME     | PVALUE   | N  | N_IND<br>EP | P_I_B<br>EST | T_I_BEST                                 | P_I_WO<br>RST | T_I_WORST                                 | EIGEN_<br>MAX | EIGEN_<br>MIN | EIGEN_MIN<br>_KEPT | Z_MI<br>N | Z_MA<br>X | Z_ME<br>AN | Z_SD     |
|---------------------------|---------------|----------|----|-------------|--------------|------------------------------------------|---------------|-------------------------------------------|---------------|---------------|--------------------|-----------|-----------|------------|----------|
| <b>ENSG00000185736.15</b> | ADARB2        | 4.26E-07 | 6  | 5           | 3.86E-08     | Brain_Amygdala                           | 0.80390004    | Brain_Cerebellum                          | 2.337136      | 1.29E-18      | 0.169514           | 0.248303  | 5.497323  | 2.947977   | 2.12053  |
| <b>ENSG00000177352.9</b>  | CCDC71        | 2.87E-09 | 13 | 1           | 1.07E-10     | Brain_Amygdala                           | 0.0001064     | Brain_Cortex                              | 12.36216      | 2.26E-19      | 12.36216           | 3.875514  | 6.45714   | 5.774468   | 0.928683 |
| <b>ENSG00000124228.14</b> | DDX27         | 6.76E-07 | 8  | 2           | 1.11E-07     | Brain_Amygdala                           | 0.006949999   | Brain_Cerebellar_Hemisph<br>ere           | 7.203769      | 1.45E-33      | 0.796231           | -2.69923  | 5.308057  | 1.675719   | 2.846354 |
| <b>ENSG00000170837.2</b>  | GPR27         | 4.25E-06 | 14 | 3           | 1.04E-07     | Brain_Amygdala                           | 0.549300019   | Whole_Blood                               | 10.814        | 3.29E-17      | 0.998184           | 0.598809  | 5.31872   | 4.352029   | 1.265387 |
| <b>ENSG00000233822.4</b>  | HIST1H2B<br>N | 7.45E-16 | 13 | 2           | 9.30E-17     | Brain_Amygdala                           | 0.349800002   | Brain_Cerebellar_Hemisph<br>ere           | 7.379185      | 1.02E-32      | 5.620815           | -0.93498  | 8.313411  | 4.423304   | 4.561427 |
| <b>ENSG00000185345.18</b> | PARK2         | 3.16E-08 | 12 | 3           | 9.36E-09     | Brain_Amygdala                           | 0.805300002   | Brain_Putamen_basal_gan<br>glia           | 6.421233      | 1.08E-18      | 1.496722           | -3.1928   | 5.741882  | 2.312451   | 3.747521 |
| <b>ENSG00000211450.9</b>  | SELENOH       | 4.89E-11 | 7  | 1           | 4.89E-11     | Brain_Amygdala                           | 4.89E-11      | Brain_Nucleus_accumbens<br>_basal_ganglia | 7             | 1.89E-33      | 7                  | -6.57413  | -6.57413  | -6.57413   | 3.63E-16 |
| <b>ENSG00000100372.14</b> | SLC25A17      | 3.34E-12 | 12 | 3           | 1.74E-13     | Brain_Amygdala                           | 0.118799987   | Brain_Anterior_cingulate_<br>cortex_BA24  | 8.398641      | 3.80E-18      | 0.48444            | 1.55985   | 7.367621  | 5.592848   | 2.484963 |
| <b>ENSG00000120896.13</b> | SORBS3        | 7.15E-07 | 12 | 4           | 1.52E-07     | Brain_Amygdala                           | 0.857905438   | Brain_Cerebellum                          | 7.570772      | 1.76E-17      | 0.272294           | -5.24965  | -0.17904  | -3.87927   | 1.562559 |
| <b>ENSG00000100380.13</b> | ST13          | 2.60E-07 | 3  | 3           | 1.02E-08     | Brain_Amygdala                           | 0.091890003   | Brain_Putamen_basal_gan<br>glia           | 1.941039      | 0.153932      | 0.153932           | 1.685511  | 5.726871  | 3.955482   | 2.066298 |
| <b>ENSG00000187626.8</b>  | ZKSCAN4       | 8.66E-25 | 12 | 4           | 1.65E-12     | Brain_Amygdala                           | 0.540599996   | Brain_Substantia_nigra                    | 10.26168      | 3.83E-17      | 0.385879           | -7.06126  | -0.61191  | -5.2116    | 2.751543 |
| <b>ENSG00000196653.11</b> | ZNF502        | 8.67E-09 | 14 | 2           | 2.19E-09     | Brain_Amygdala                           | 3.39E-05      | Brain_Spinal_cord_cervica<br>l_c-1        | 12.46654      | 1.18E-17      | 1.491818           | -5.9829   | -4.14559  | -4.92231   | 0.81104  |
| <b>ENSG00000139567.12</b> | ACVRL1        | 6.13E-07 | 4  | 3           | 9.85E-08     | Brain_Anterior_cingulate_<br>cortex_BA24 | 0.745681423   | Brain_Caudate_basal_gan<br>glia           | 2.561269      | 6.24E-18      | 0.472098           | -5.32951  | 0.324339  | -3.00467   | 2.806907 |
| <b>ENSG00000166165.12</b> | CKB           | 5.57E-11 | 14 | 3           | 4.36E-12     | Brain_Anterior_cingulate_<br>cortex_BA24 | 0.658017149   | Brain_Nucleus_accumbens<br>_basal_ganglia | 9.860498      | 1.65E-17      | 0.897398           | -6.92501  | 6.311021  | -3.78399   | 3.882756 |

|                            |             |          |        |   |          |                                      |             |                                       |          |          |          |              |              |              |          |
|----------------------------|-------------|----------|--------|---|----------|--------------------------------------|-------------|---------------------------------------|----------|----------|----------|--------------|--------------|--------------|----------|
| <b>ENSG00000077063.10</b>  | CTTNBP2     | 7.71E-10 | 1<br>1 | 5 | 2.48E-10 | Brain_Anterior_cingulate_cortex_BA24 | 0.888400003 | Brain_Amygdala                        | 5.42763  | 3.84E-18 | 0.328584 | -<br>6.32804 | 5.720198     | -<br>0.961   | 4.010373 |
| <b>ENSG000000100395.14</b> | L3MBTL2     | 7.00E-14 | 6<br>2 | 2 | 1.09E-14 | Brain_Anterior_cingulate_cortex_BA24 | 0.457341302 | Brain_Nucleus_accumbens_basal_ganglia | 4.968836 | 0.00211  | 0.995825 | -<br>0.74323 | 7.727708     | 3.466047     | 2.824835 |
| <b>ENSG000000204410.14</b> | MSH5        | 5.52E-08 | 1<br>3 | 4 | 8.77E-08 | Brain_Anterior_cingulate_cortex_BA24 | 0.940976959 | Whole_Blood                           | 6.668273 | 1.84E-17 | 0.453258 | 0.074042     | 5.35054      | 3.335814     | 1.70869  |
| <b>ENSG000000204962.5</b>  | PCDHA8      | 4.48E-07 | 1<br>3 | 2 | 6.44E-08 | Brain_Anterior_cingulate_cortex_BA24 | 0.033799998 | Brain_Amygdala                        | 10.98025 | 9.84E-18 | 1.743951 | -<br>5.40617 | -<br>2.12245 | -<br>4.76358 | 1.187356 |
| <b>ENSG000000049449.8</b>  | RCN1        | 7.67E-09 | 1<br>3 | 2 | 1.16E-09 | Brain_Anterior_cingulate_cortex_BA24 | 0.819599996 | Whole_Blood                           | 12.00353 | 2.50E-17 | 0.99647  | -<br>0.22806 | 6.086092     | 5.600388     | 1.751231 |
| <b>ENSG000000283458.1</b>  | RP11-112.1  | 1.29E-06 | 8<br>2 | 2 | 4.17E-08 | Brain_Anterior_cingulate_cortex_BA24 | 0.001180724 | Brain_Caudate_basal_ganglia           | 7.063877 | 5.17E-18 | 0.792181 | -<br>5.48353 | -<br>3.2435  | -<br>4.88938 | 0.698099 |
| <b>ENSG000000279325.1</b>  | RP11-24H2.3 | 2.67E-11 | 2<br>2 | 2 | 2.64E-11 | Brain_Anterior_cingulate_cortex_BA24 | 1.68E-07    | Brain_Amygdala                        | 1.52042  | 0.47958  | 0.47958  | -<br>6.66526 | -<br>5.23198 | -<br>5.94862 | 1.013478 |
| <b>ENSG000000225399.4</b>  | RP11-3B7.1  | 6.77E-12 | 4<br>2 | 2 | 3.93E-10 | Brain_Anterior_cingulate_cortex_BA24 | 0.611200002 | Brain_Cortex                          | 2.851496 | 1.98E-17 | 1.148504 | -<br>6.25678 | 0.508361     | -<br>2.87421 | 3.905858 |
| <b>ENSG000000272468.1</b>  | RP1-86C11.7 | 6.46E-11 | 1<br>0 | 4 | 3.71E-10 | Brain_Anterior_cingulate_cortex_BA24 | 0.769567752 | Brain_Hypothalamus                    | 5.849808 | 1.94E-18 | 0.502065 | -<br>6.26576 | 6.265765     | 1.706523     | 4.175685 |
| <b>ENSG000000115524.15</b> | SF3B1       | 1.65E-07 | 1<br>0 | 1 | 1.65E-07 | Brain_Anterior_cingulate_cortex_BA24 | 1.65E-07    | Brain_Caudate_basal_ganglia           | 10       | 3.42E-33 | 10       | 5.234648     | 5.234648     | 5.234648     | 6.62E-16 |
| <b>ENSG000000168273.7</b>  | SMIM4       | 1.86E-06 | 1<br>2 | 3 | 1.40E-07 | Brain_Anterior_cingulate_cortex_BA24 | 0.295700024 | Whole_Blood                           | 9.624278 | 7.92E-18 | 1.000014 | -<br>5.26536 | 1.239053     | -<br>3.88753 | 2.356024 |
| <b>ENSG000000120314.18</b> | WDR55       | 7.08E-06 | 1<br>3 | 2 | 1.55E-07 | Brain_Anterior_cingulate_cortex_BA24 | 0.6457      | Brain_Frontal_Cortex_BA9              | 10.70791 | 5.07E-17 | 1.952286 | -<br>5.24641 | -<br>0.45974 | -<br>3.94851 | 1.521598 |
| <b>ENSG000000101489.19</b> | CELF4       | 5.04E-14 | 1<br>2 | 6 | 1.13E-16 | Brain_Caudate_basal_ganglia          | 0.706744282 | Brain_Anterior_cingulate_cortex_BA24  | 6.104946 | 4.26E-17 | 0.426476 | -<br>7.61516 | 8.2907       | 3.206687     | 4.824023 |
| <b>ENSG000000100399.15</b> | CHADL       | 1.45E-09 | 5<br>3 | 3 | 1.29E-10 | Brain_Caudate_basal_ganglia          | 0.01347     | Brain_Nucleus_accumbens_basal_ganglia | 3.722216 | 4.14E-18 | 0.182316 | 2.471095     | 6.4287       | 4.916034     | 2.075036 |
| <b>ENSG000000119616.11</b> | FCF1        | 9.15E-14 | 1<br>2 | 2 | 2.63E-14 | Brain_Caudate_basal_ganglia          | 0.101199991 | Brain_Hypothalamus                    | 10.47387 | 2.67E-17 | 1.420002 | 1.639064     | 7.615145     | 3.560412     | 2.081913 |

|                           |             |          |        |   |          |                             |             |                                       |          |          |          |              |              |              |              |
|---------------------------|-------------|----------|--------|---|----------|-----------------------------|-------------|---------------------------------------|----------|----------|----------|--------------|--------------|--------------|--------------|
| <b>ENSG00000267325.1</b>  | LINC01415   | 6.38E-10 | 1<br>1 | 4 | 1.87E-09 | Brain_Caudate_basal_glia    | 0.006034999 | Brain_Putamen_basal_glia              | 6.319835 | 1.17E-18 | 0.251895 | -<br>6.00906 | -<br>2.74587 | -<br>4.56627 | 1.539<br>704 |
| <b>ENSG00000250156.3</b>  | LINC02060   | 1.91E-09 | 1<br>0 | 1 | 1.91E-09 | Brain_Caudate_basal_glia    | 1.91E-09    | Brain_Nucleus_accumbens_basal_ganglia | 10       | 2.69E-17 | 10       | 6.004858     | 6.004858     | 6.004858     | 1.32E-15     |
| <b>ENSG00000007372.21</b> | PAX6        | 9.36E-12 | 1<br>2 | 1 | 9.36E-12 | Brain_Caudate_basal_glia    | 9.36E-12    | Brain_Amygdala                        | 12       | 7.99E-17 | 12       | 6.816031     | 6.816031     | 6.816031     | 4.64E-16     |
| <b>ENSG000000041353.9</b> | RAB27B      | 2.46E-08 | 1<br>0 | 3 | 1.44E-08 | Brain_Caudate_basal_glia    | 0.8522      | Brain_Anterior_cingulate_cortex_BA24  | 7.08631  | 2.30E-18 | 0.985783 | -<br>1.55184 | 5.668325     | 3.762557     | 3.089101     |
| <b>ENSG00000172575.11</b> | RASGRP1     | 1.86E-06 | 1<br>0 | 2 | 1.63E-07 | Brain_Caudate_basal_glia    | 0.791300003 | Brain_Amygdala                        | 8.865565 | 4.52E-17 | 1.07511  | -<br>5.23678 | 5.028085     | 0.49346      | 4.909751     |
| <b>ENSG00000096654.15</b> | ZNF184      | 1.02E-15 | 1<br>1 | 2 | 1.85E-09 | Brain_Caudate_basal_glia    | 0.0029      | Brain_Hippocampus                     | 10.60197 | 9.53E-18 | 0.398028 | -<br>6.01012 | -<br>2.97814 | -<br>3.80368 | 1.38953      |
| <b>ENSG00000112763.15</b> | BTN2A1      | 3.94E-10 | 1<br>3 | 2 | 3.11E-09 | Brain_Cerebellar_Hemisphere | 0.113399986 | Brain_Caudate_basal_glia              | 10.84433 | 2.73E-17 | 1.413134 | -<br>5.92584 | -<br>1.58309 | -<br>2.92613 | 1.672474     |
| <b>ENSG00000261353.1</b>  | CTA-14H9.5  | 3.24E-12 | 6      | 3 | 1.38E-12 | Brain_Cerebellar_Hemisphere | 3.92E-06    | Brain_Caudate_basal_glia              | 3.932636 | 2.29E-17 | 0.486362 | -<br>4.61537 | 7.085944     | 2.898789     | 5.858451     |
| <b>ENSG00000250377.1</b>  | CTC-467M3.3 | 9.59E-11 | 5      | 2 | 5.55E-11 | Brain_Cerebellar_Hemisphere | 2.98E-09    | Brain_Frontal_Cortex_BA9              | 4.573121 | 7.31E-17 | 0.426879 | -<br>6.55535 | -<br>5.93286 | -<br>6.05736 | 0.278384     |
| <b>ENSG00000281649.1</b>  | EBLN3P      | 2.36E-10 | 1<br>0 | 3 | 2.79E-08 | Brain_Cerebellar_Hemisphere | 0.020380006 | Brain_Cortex                          | 7.625815 | 1.38E-17 | 0.736006 | -<br>2.56413 | 5.553816     | 3.612867     | 3.301147     |
| <b>ENSG00000149485.18</b> | FADS1       | 1.47E-06 | 1<br>4 | 2 | 4.33E-09 | Brain_Cerebellar_Hemisphere | 0.005198999 | Brain_Spinal_cord_cervical_c-1        | 12.63439 | 9.13E-17 | 0.690862 | -<br>5.87098 | 5.760692     | -<br>4.0759  | 2.99274      |
| <b>ENSG00000228223.2</b>  | HCG11       | 7.66E-11 | 7      | 5 | 1.38E-12 | Brain_Cerebellar_Hemisphere | 0.534000007 | Whole_Blood                           | 2.888001 | 2.84E-17 | 0.617551 | 0.621912     | 7.085944     | 3.977141     | 2.602756     |
| <b>ENSG00000204389.9</b>  | HSPA1A      | 1.08E-07 | 3      | 1 | 1.08E-07 | Brain_Cerebellar_Hemisphere | 1.08E-07    | Brain_Substantia_nigra                | 3        | 5.47E-48 | 3        | 5.31188      | 5.31188      | 5.31188      | 6.28E-16     |
| <b>ENSG00000204970.9</b>  | PCDHA1      | 9.37E-08 | 9      | 1 | 6.42E-08 | Brain_Cerebellar_Hemisphere | 1.05E-07    | Brain_Anterior_cingulate_cortex_BA24  | 8.995428 | 2.90E-17 | 8.995428 | -<br>5.31733 | 5.40669      | 4.15556      | 3.552545     |
| <b>ENSG00000204969.6</b>  | PCDHA2      | 1.14E-06 | 6      | 1 | 6.17E-08 | Brain_Cerebellar_Hemisphere | 0.042230003 | Brain_Frontal_Cortex_BA9              | 5.972292 | 3.96E-17 | 5.972292 | -<br>5.4138  | 5.413803     | -<br>1.24084 | 5.318537     |

|                           |         |          |   |   |   |          |                             |             |                                       |          |          |          |         |         |         |       |
|---------------------------|---------|----------|---|---|---|----------|-----------------------------|-------------|---------------------------------------|----------|----------|----------|---------|---------|---------|-------|
| <b>ENSG00000255408.3</b>  | PCDHA3  | 1.50E-06 | 1 | 3 | 2 | 1.17E-07 | Brain_Cerebellar_Hemisphere | 0.590418874 | Brain_Cortex                          | 8.285453 | 6.52E-17 | 0.430401 | -       | 5.298   | -       | 3.085 |
|                           |         |          |   |   |   |          |                             |             |                                       |          |          |          | 5.12624 | 667     | 0.53257 | 417   |
| <b>ENSG00000137338.5</b>  | PGBD1   | 1.55E-12 | 1 | 5 | 3 | 1.67E-13 | Brain_Cerebellar_Hemisphere | 0.978935906 | Brain_Nucleus_accumbens_basal_ganglia | 5.549999 | 1.21E-17 | 0.290674 | -       | 1.326   | -       | 3.356 |
|                           |         |          |   |   |   |          |                             |             |                                       |          |          |          | 7.37263 | 12      | 3.0449  | 75    |
| <b>ENSG00000248483.6</b>  | POU5F2  | 4.11E-09 | 2 | 1 | 1 | 4.11E-09 | Brain_Cerebellar_Hemisphere | 4.11E-09    | Brain_Cerebellar_Hemisphere           | 2        | 0        | 2        | -       | -       | -       | 0     |
|                           |         |          |   |   |   |          |                             |             |                                       |          |          |          | 5.87974 | 5.87974 | 5.87974 |       |
| <b>ENSG00000100387.8</b>  | RBX1    | 1.30E-08 | 1 | 2 | 0 | 4.34E-09 | Brain_Cerebellar_Hemisphere | 0.160400001 | Brain_Spinal_cord_cervical_c-1        | 9.000067 | 7.65E-17 | 0.999933 | -       | 1.403   | 0.676   | 2.300 |
|                           |         |          |   |   |   |          |                             |             |                                       |          |          |          | 5.87065 | 728     | 29      | 359   |
| <b>ENSG00000162367.11</b> | TAL1    | 5.30E-07 | 1 | 2 | 0 | 9.01E-08 | Brain_Cerebellar_Hemisphere | 0.837599998 | Brain_Cerebellum                      | 8.745246 | 1.41E-17 | 0.976135 | -       | 5.345   | 3.675   | 3.526 |
|                           |         |          |   |   |   |          |                             |             |                                       |          |          |          | 5.29115 | 656     | 48      | 309   |
| <b>ENSG00000182179.12</b> | UBA7    | 5.49E-10 | 3 | 1 | 1 | 5.49E-10 | Brain_Cerebellar_Hemisphere | 5.49E-10    | Brain_Cerebellum                      | 3        | 0        | 3        | -       | -       | -       | 8.88E |
|                           |         |          |   |   |   |          |                             |             |                                       |          |          |          | 6.20436 | 6.20436 | 6.20436 | -16   |
| <b>ENSG00000178917.15</b> | ZNF852  | 9.97E-11 | 1 | 2 | 1 | 6.18E-10 | Brain_Cerebellar_Hemisphere | 7.18E-07    | Brain_Anterior_cingulate_cortex_BA24  | 8.560703 | 1.86E-17 | 2.439297 | -       | 5.749   | 1.276   | 5.922 |
|                           |         |          |   |   |   |          |                             |             |                                       |          |          |          | 6.18564 | 893     | 386     | 631   |
| <b>ENSG00000119682.16</b> | AREL1   | 1.46E-13 | 1 | 2 | 0 | 2.63E-14 | Brain_Cerebellum            | 0.0004835   | Brain_Cortex                          | 8.798951 | 9.66E-22 | 1.153419 | -       | -       | -       | 1.748 |
|                           |         |          |   |   |   |          |                             |             |                                       |          |          |          | 7.61514 | 3.48973 | 4.81375 | 601   |
| <b>ENSG00000112249.13</b> | ASCC3   | 2.77E-08 | 1 | 4 | 3 | 4.97E-09 | Brain_Cerebellum            | 0.9911      | Brain_Putamen_basal_ganglia           | 7.801973 | 2.08E-18 | 0.492841 | -       | 0.080   | -       | 1.619 |
|                           |         |          |   |   |   |          |                             |             |                                       |          |          |          | 5.84819 | 573     | 2.13781 | 107   |
| <b>ENSG00000164061.4</b>  | BSN     | 2.01E-10 | 2 | 2 | 2 | 1.23E-10 | Brain_Cerebellum            | 2.71E-05    | Brain_Cortex                          | 1.39497  | 0.60503  | 0.60503  | -       | 4.196   | -       | 7.517 |
|                           |         |          |   |   |   |          |                             |             |                                       |          |          |          | 6.43521 | 811     | 1.1192  | 976   |
| <b>ENSG00000213047.12</b> | DENND1B | 3.67E-15 | 6 | 3 | 3 | 5.10E-16 | Brain_Cerebellum            | 0.347000012 | Brain_Cortex                          | 4.344346 | 1.90E-19 | 0.734034 | 0.940   | 8.109   | 5.346   | 3.343 |
|                           |         |          |   |   |   |          |                             |             |                                       |          |          |          | 424     | 1       | 974     | 45    |
| <b>ENSG00000134824.13</b> | FADS2   | 1.58E-07 | 8 | 2 | 2 | 1.01E-08 | Brain_Cerebellum            | 0.570699987 | Brain_Cortex                          | 6.37226  | 1.22E-16 | 1.298069 | -       | 5.373   | -       | 5.239 |
|                           |         |          |   |   |   |          |                             |             |                                       |          |          |          | 5.72854 | 424     | 0.68958 | 38    |
| <b>ENSG00000126214.21</b> | KLC1    | 4.06E-10 | 1 | 4 | 0 | 1.91E-12 | Brain_Cerebellum            | 0.014800004 | Brain_Hypothalamus                    | 6.201084 | 2.18E-17 | 0.320961 | -       | 7.040   | 3.508   | 2.635 |
|                           |         |          |   |   |   |          |                             |             |                                       |          |          |          | 2.43724 | 742     | 421     | 873   |
| <b>ENSG00000118263.14</b> | KLF7    | 2.25E-10 | 7 | 3 | 3 | 2.17E-09 | Brain_Cerebellum            | 0.265400017 | Whole_Blood                           | 4.53037  | 2.68E-17 | 0.33403  | -       | -       | -       | 2.189 |
|                           |         |          |   |   |   |          |                             |             |                                       |          |          |          | 5.98417 | 1.11372 | 3.75217 | 727   |
| <b>ENSG00000155719.16</b> | OTOA    | 1.55E-08 | 4 | 2 | 2 | 2.47E-09 | Brain_Cerebellum            | 0.001577    | Brain_Cortex                          | 3.460284 | 1.03E-16 | 0.539716 | 3.160   | 5.963   | 5.262   | 1.401 |
|                           |         |          |   |   |   |          |                             |             |                                       |          |          |          | 128     | 494     | 653     | 683   |

|                           |               |          |        |   |          |                  |             |                                       |          |          |          |              |              |              |              |
|---------------------------|---------------|----------|--------|---|----------|------------------|-------------|---------------------------------------|----------|----------|----------|--------------|--------------|--------------|--------------|
| <b>ENSG00000112812.15</b> | PRSS16        | 3.42E-14 | 1<br>1 | 6 | 3.87E-10 | Brain_Cerebellum | 0.89930002  | Brain_Putamen_basal_ganglia           | 5.040955 | 2.25E-18 | 0.235869 | -<br>6.25909 | 2.743<br>814 | -<br>3.32754 | 2.973<br>102 |
| <b>ENSG00000102572.14</b> | STK24         | 2.51E-07 | 1<br>2 | 3 | 1.16E-10 | Brain_Cerebellum | 0.062689997 | Brain_Spinal_cord_cervical_c-1        | 8.223419 | 2.47E-17 | 0.42689  | -<br>5.22065 | 6.444<br>105 | 1.688<br>907 | 3.696<br>381 |
| <b>ENSG00000169964.7</b>  | TMEM42        | 3.74E-10 | 1<br>4 | 3 | 2.79E-10 | Brain_Cerebellum | 0.43790002  | Brain_Cerebellar_Hemisphere           | 10.83483 | 3.59E-17 | 0.722788 | -<br>6.30996 | -<br>0.77574 | -<br>2.53727 | 2.185<br>663 |
| <b>ENSG00000196345.12</b> | ZKSCAN7       | 1.44E-11 | 1<br>1 | 4 | 2.39E-11 | Brain_Cerebellum | 0.264900024 | Brain_Frontal_Cortex_BA9              | 7.092933 | 8.81E-18 | 0.404935 | -<br>6.68023 | 1.114<br>884 | -<br>5.36983 | 2.486<br>557 |
| <b>ENSG00000186446.11</b> | ZNF501        | 2.21E-08 | 1<br>4 | 2 | 6.27E-09 | Brain_Cerebellum | 0.002795001 | Brain_Nucleus_accumbens_basal_ganglia | 13.20588 | 6.41E-18 | 0.458661 | -<br>5.80944 | -<br>2.98943 | -<br>4.63418 | 0.819<br>628 |
| <b>ENSG00000137185.11</b> | ZSCAN9        | 1.40E-20 | 1<br>4 | 3 | 8.40E-17 | Brain_Cerebellum | 0.343020346 | Whole_Blood                           | 10.05555 | 5.12E-17 | 1.215407 | -<br>8.32548 | -<br>0.94821 | -<br>5.94954 | 2.377<br>012 |
| <b>ENSG00000166170.9</b>  | BAG5          | 3.63E-11 | 1<br>0 | 4 | 6.67E-13 | Brain_Cortex     | 0.9652      | Brain_Hippocampus                     | 6.35792  | 5.45E-18 | 0.231519 | -<br>0.04363 | 7.185<br>997 | 5.139<br>761 | 2.606<br>918 |
| <b>ENSG00000134376.15</b> | CRB1          | 1.66E-13 | 1<br>1 | 1 | 1.66E-13 | Brain_Cortex     | 1.66E-13    | Brain_Cortex                          | 1        | 1        | 1        | -<br>7.37375 | -<br>7.37375 | -<br>7.37375 | NA           |
| <b>ENSG00000258636.1</b>  | CTD-2298J14.2 | 3.32E-15 | 7      | 3 | 3.53E-16 | Brain_Cortex     | 0.166799999 | Brain_Anterior_cingulate_cortex_BA24  | 3.471243 | 9.15E-17 | 1.170157 | -<br>8.15379 | -<br>1.38256 | -<br>3.35956 | 3.275<br>382 |
| <b>ENSG00000204390.9</b>  | HSPA1L        | 4.31E-07 | 8      | 4 | 1.08E-07 | Brain_Cortex     | 0.671696397 | Brain_Cerebellum                      | 3.438814 | 3.95E-17 | 0.276405 | -<br>5.31188 | 5.311<br>88  | -<br>0.31336 | 2.911<br>133 |
| <b>ENSG00000187772.7</b>  | LIN28B        | 1.32E-10 | 8      | 2 | 3.36E-08 | Brain_Cortex     | 0.014919996 | Brain_Amygdala                        | 5.365733 | 4.00E-18 | 2.634267 | -<br>5.5214  | 2.434<br>315 | -<br>2.37482 | 3.294<br>349 |
| <b>ENSG00000165379.13</b> | LRFN5         | 2.64E-14 | 1<br>0 | 4 | 2.81E-16 | Brain_Cortex     | 0.023240007 | Brain_Caudate_basal_ganglia           | 7.502104 | 7.01E-17 | 0.575054 | -<br>7.95641 | 8.181<br>342 | 0.454<br>572 | 7.420<br>767 |
| <b>ENSG00000119608.12</b> | PROX2         | 1.40E-12 | 1<br>1 | 2 | 1.48E-13 | Brain_Cortex     | 0.006690002 | Brain_Anterior_cingulate_cortex_BA24  | 10.14095 | 9.85E-18 | 0.859046 | -<br>7.38858 | -<br>2.71189 | -<br>3.13705 | 1.410<br>075 |
| <b>ENSG00000261839.1</b>  | RP1-265C24.8  | 9.11E-12 | 1<br>3 | 3 | 6.64E-10 | Brain_Cortex     | 0.367800012 | Brain_Cerebellar_Hemisphere           | 9.698419 | 7.03E-17 | 1.230748 | -<br>6.17436 | 3.850<br>245 | 2.073<br>283 | 3.726<br>965 |

|                           |           |             |        |   |          |                          |             |                                           |          |          |          |              |              |              |          |
|---------------------------|-----------|-------------|--------|---|----------|--------------------------|-------------|-------------------------------------------|----------|----------|----------|--------------|--------------|--------------|----------|
| <b>ENSG00000124214.19</b> | STAU1     | 8.25E-08    | 1<br>3 | 3 | 2.03E-08 | Brain_Cortex             | 0.962499999 | Brain_Cerebellar_Hemisph<br>ere           | 9.621344 | 3.66E-17 | 1.008888 | -<br>5.60925 | 0.069992     | -<br>3.02407 | 1.847893 |
| <b>ENSG00000179152.19</b> | TCAIM     | 1.69E-09    | 1<br>4 | 4 | 4.21E-08 | Brain_Cortex             | 0.685970603 | Whole_Blood                               | 6.125752 | 1.06E-17 | 0.412739 | -<br>5.48185 | 0.815825     | -<br>2.24947 | 2.280499 |
| <b>ENSG00000164180.13</b> | TMEM161B  | 2.42E-15    | 7      | 2 | 1.84E-12 | Brain_Cortex             | 0.104357766 | Brain_Anterior_cingulate_<br>cortex_BA24  | 5.312115 | 2.96E-35 | 1.687885 | -<br>7.0461  | -<br>1.62408 | -<br>5.52287 | 2.601945 |
| <b>ENSG00000119596.17</b> | YLPM1     | 1.33E-12    | 5      | 2 | 1.41E-13 | Brain_Cortex             | 0.079989999 | Brain_Caudate_basal_gan<br>glia           | 4.072072 | 1.78E-32 | 0.927928 | 1.750744     | 7.395667     | 6.266682     | 2.524486 |
| <b>ENSG00000164062.12</b> | APEH      | 4.19E-10    | 1<br>0 | 3 | 4.71E-10 | Brain_Frontal_Cortex_BA9 | 0.348299997 | Brain_Amygdala                            | 7.383822 | 4.45E-17 | 0.685339 | -<br>4.32174 | 6.228374     | 0.188368     | 3.028088 |
| <b>ENSG00000120334.15</b> | CENPL     | 9.51E-10    | 1      | 1 | 9.51E-10 | Brain_Frontal_Cortex_BA9 | 9.51E-10    | Brain_Frontal_Cortex_BA9                  | 1        | 1        | 1        | 6.117441     | 6.117441     | 6.117441     | NA       |
| <b>ENSG00000134852.14</b> | CLOCK     | 2.31E-06    | 1<br>2 | 3 | 9.89E-08 | Brain_Frontal_Cortex_BA9 | 0.048659993 | Brain_Substantia_nigra                    | 6.364584 | 1.06E-17 | 1.310042 | -<br>1.97156 | 5.328652     | 3.041543     | 2.081927 |
| <b>ENSG00000048828.16</b> | FAM120A   | 3.44E-11    | 7      | 3 | 3.25E-10 | Brain_Frontal_Cortex_BA9 | 1.08E-06    | Brain_Nucleus_accumbens_<br>basal_ganglia | 5.566305 | 4.59E-17 | 0.503154 | -<br>6.28655 | 6.286549     | -<br>2.41732 | 5.729832 |
| <b>ENSG00000204965.8</b>  | PCDHA5    | 2.09E-06    | 7      | 3 | 6.07E-08 | Brain_Frontal_Cortex_BA9 | 0.073420003 | Brain_Cerebellum                          | 4.485626 | 5.19E-17 | 0.207165 | -<br>5.4167  | 5.416698     | -<br>0.64988 | 4.545191 |
| <b>ENSG00000120910.14</b> | PPP3CC    | 4.38E-05    | 1<br>3 | 3 | 1.77E-07 | Brain_Frontal_Cortex_BA9 | 0.224899991 | Brain_Putamen_basal_gan<br>glia           | 9.921608 | 6.20E-17 | 0.627881 | 1.213601     | 5.222315     | 3.63374      | 1.418124 |
| <b>ENSG00000157837.15</b> | SPPL3     | 1.10E-10    | 1<br>1 | 3 | 9.32E-12 | Brain_Frontal_Cortex_BA9 | 0.272775709 | Whole_Blood                               | 9.160607 | 1.17E-16 | 0.500319 | -<br>6.8166  | 1.096693     | -<br>5.3049  | 2.292288 |
| <b>ENSG00000166166.12</b> | TRMT61A   | 5.90E-10    | 1<br>4 | 3 | 1.14E-10 | Brain_Frontal_Cortex_BA9 | 0.259800005 | Brain_Substantia_nigra                    | 8.865914 | 1.01E-17 | 0.987933 | 1.126864     | 6.446981     | 2.721405     | 1.822599 |
| <b>ENSG00000156599.10</b> | ZDHHC5    | 1.65E-10    | 1<br>4 | 3 | 5.01E-11 | Brain_Frontal_Cortex_BA9 | 0.250300001 | Brain_Hypothalamus                        | 11.17146 | 6.39E-18 | 0.421035 | -<br>6.57061 | 6.499527     | -<br>1.20263 | 3.508481 |
| <b>ENSG00000182272.11</b> | B4GALNT4  | 0.000133643 | 1<br>3 | 4 | 3.85E-08 | Brain_Hippocampus        | 0.526047171 | Brain_Cerebellar_Hemisph<br>ere           | 8.749351 | 1.53E-17 | 0.330391 | -<br>1.15084 | 5.497552     | 2.806018     | 1.778762 |
| <b>ENSG00000226913.1</b>  | BSN-AS2   | 3.53E-10    | 1<br>3 | 2 | 1.23E-10 | Brain_Hippocampus        | 0.066689996 | Brain_Amygdala                            | 12.15891 | 3.73E-18 | 0.827092 | 1.833758     | 6.435214     | 2.357433     | 1.361371 |
| <b>ENSG00000245526.10</b> | LINC00461 | 1.31E-10    | 5      | 2 | 1.55E-11 | Brain_Hippocampus        | 5.42E-09    | Brain_Nucleus_accumbens_<br>basal_ganglia | 4.766789 | 1.06E-16 | 0.227926 | -<br>6.74299 | -<br>5.83358 | -<br>6.05393 | 0.388185 |

|                            |              |          |        |   |          |                    |             |                                       |          |          |          |              |             |              |          |
|----------------------------|--------------|----------|--------|---|----------|--------------------|-------------|---------------------------------------|----------|----------|----------|--------------|-------------|--------------|----------|
| <b>ENSG00000076685.18</b>  | NT5C2        | 1.16E-06 | 1<br>3 | 5 | 4.42E-09 | Brain_Hippocampus  | 0.766473638 | Brain_Hypothalamus                    | 7.107372 | 1.38E-16 | 0.433927 | -<br>5.86783 | 0.950054    | -<br>1.60929 | 2.011593 |
| <b>ENSG00000067560.10</b>  | RHOA         | 6.35E-11 | 1<br>1 | 2 | 4.96E-11 | Brain_Hippocampus  | 0.063730006 | Brain_Amygdala                        | 7.9307   | 2.97E-18 | 3.061954 | -<br>1.85406 | 6.572102    | 1.697012     | 3.464067 |
| <b>ENSG000000271755.1</b>  | RP1-153G14.4 | 2.21E-15 | 1<br>3 | 4 | 3.82E-15 | Brain_Hippocampus  | 0.045740003 | Brain_Spinal_cord_cervical_c-1        | 9.043862 | 4.57E-17 | 0.476364 | -<br>2.13698 | 7.860829    | 3.502757     | 3.458909 |
| <b>ENSG000000124140.13</b> | SLC12A5      | 4.55E-13 | 1<br>2 | 6 | 1.82E-12 | Brain_Hippocampus  | 0.20449998  | Brain_Nucleus_accumbens_basal_ganglia | 5.740457 | 1.33E-17 | 0.282995 | -<br>2.08886 | 7.047853    | 3.331488     | 2.837392 |
| <b>ENSG000000221995.5</b>  | TIAF1        | 3.07E-05 | 1<br>4 | 2 | 1.79E-07 | Brain_Hippocampus  | 0.747200001 | Brain_Putamen_basal_ganglia           | 11.31803 | 5.73E-17 | 1.766909 | -<br>5.22001 | 0.477228    | -<br>3.76368 | 1.818707 |
| <b>ENSG000000158691.14</b> | ZSCAN12      | 3.19E-20 | 1<br>4 | 5 | 1.14E-18 | Brain_Hippocampus  | 0.849699994 | Brain_Frontal_Cortex_BA9              | 6.153374 | 3.03E-17 | 0.85018  | -<br>1.54787 | 8.820546    | 1.12584      | 3.03877  |
| <b>ENSG000000124207.16</b> | CSE1L        | 4.54E-07 | 1<br>4 | 3 | 3.29E-08 | Brain_Hypothalamus | 0.230800013 | Brain_Amygdala                        | 11.79445 | 1.75E-17 | 0.461612 | -<br>5.52537 | -<br>1.1983 | -<br>3.89394 | 1.546142 |
| <b>ENSG000000100393.12</b> | EP300        | 1.25E-13 | 1<br>4 | 2 | 3.78E-13 | Brain_Hypothalamus | 0.015950005 | Brain_Substantia_nigra                | 12.56503 | 4.03E-17 | 1.433701 | 2.410058     | 7.263197    | 5.098588     | 1.315038 |
| <b>ENSG000000140564.11</b> | FURIN        | 2.27E-07 | 1<br>3 | 5 | 1.63E-09 | Brain_Hypothalamus | 0.836700005 | Whole_Blood                           | 8.367737 | 2.01E-17 | 0.512666 | -<br>6.03135 | 0.206116    | -<br>3.40558 | 1.738731 |
| <b>ENSG000000096433.10</b> | ITPR3        | 2.72E-08 | 1<br>2 | 5 | 1.01E-07 | Brain_Hypothalamus | 0.595474198 | Brain_Cerebellum                      | 6.273661 | 6.66E-18 | 0.281793 | -<br>3.04536 | 5.324772    | 1.437199     | 2.857531 |
| <b>ENSG000000178053.17</b> | MLF1         | 1.16E-09 | 1<br>4 | 4 | 3.90E-08 | Brain_Hypothalamus | 0.876841874 | Brain_Frontal_Cortex_BA9              | 6.120224 | 4.05E-17 | 0.364634 | -<br>2.318   | 5.495111    | 2.232306     | 2.972995 |
| <b>ENSG000000172260.14</b> | NEGR1        | 1.77E-25 | 1<br>3 | 1 | 3.19E-25 | Brain_Hypothalamus | 2.20E-23    | Brain_Cortex                          | 12.48403 | 1.09E-18 | 12.48403 | 9.963501     | 10.37591    | 10.22495     | 0.113901 |
| <b>ENSG000000145029.13</b> | NICN1        | 3.46E-11 | 1<br>2 | 4 | 4.79E-11 | Brain_Hypothalamus | 0.502199985 | Brain_Substantia_nigra                | 7.210438 | 2.34E-17 | 0.480935 | -<br>6.57729 | 5.505494    | 0.26495      | 4.443671 |
| <b>ENSG000000169760.17</b> | NLGN1        | 1.21E-07 | 1<br>3 | 3 | 1.60E-09 | Brain_Hypothalamus | 0.676600003 | Brain_Amygdala                        | 8.914815 | 6.22E-19 | 1.470625 | -<br>4.0638  | 6.033633    | -<br>0.41577 | 2.595346 |
| <b>ENSG000000260100.1</b>  | RP11-220I1.5 | 2.79E-08 | 4      | 1 | 2.79E-08 | Brain_Hypothalamus | 2.79E-08    | Brain_Amygdala                        | 4        | 0        | 4        | 5.553816     | 5.553816    | 5.553816     | 7.25E-16 |
| <b>ENSG000000131323.14</b> | TRAF3        | 2.48E-07 | 1<br>1 | 3 | 9.62E-08 | Brain_Hypothalamus | 0.48962568  | Whole_Blood                           | 8.994263 | 3.10E-17 | 0.353953 | 0.690904     | 5.333797    | 2.22112      | 1.601557 |



|                           |           |          |        |   |          |                                       |             |                                       |          |          |          |          |          |          |          |
|---------------------------|-----------|----------|--------|---|----------|---------------------------------------|-------------|---------------------------------------|----------|----------|----------|----------|----------|----------|----------|
| <b>ENSG00000198315.10</b> | ZKSCAN8   | 1.30E-08 | 1<br>4 | 2 | 2.55E-10 | Brain_Hypothalamus                    | 0.141866097 | Whole_Blood                           | 12.97274 | 8.99E-17 | 0.950432 | 1.468877 | 6.324208 | 5.431343 | 1.21054  |
| <b>ENSG00000118101.15</b> | BTN3A3    | 7.47E-09 | 1<br>1 | 4 | 3.21E-10 | Brain_Nucleus_accumbens_basal_ganglia | 0.13529995  | Brain_Caudate_basal_ganglia           | 7.154264 | 1.92E-18 | 0.584427 | -6.2884  | 1.515286 | -3.50585 | 3.481452 |
| <b>ENSG00000173421.16</b> | CCDC36    | 2.23E-11 | 1<br>1 | 3 | 2.41E-10 | Brain_Nucleus_accumbens_basal_ganglia | 0.590900001 | Brain_Cortex                          | 9.185412 | 4.20E-18 | 0.80301  | -6.33239 | 0.563786 | -5.05465 | 2.77143  |
| <b>ENSG00000101017.13</b> | CD40      | 5.08E-07 | 1<br>4 | 3 | 3.62E-08 | Brain_Nucleus_accumbens_basal_ganglia | 0.029285318 | Brain_Cerebellar_Hemisphere           | 11.40295 | 2.97E-17 | 0.689815 | -5.50852 | -2.17962 | -4.72003 | 0.891294 |
| <b>ENSG00000149295.13</b> | DRD2      | 7.80E-19 | 1<br>2 | 7 | 1.87E-20 | Brain_Nucleus_accumbens_basal_ganglia | 0.915155539 | Brain_Cerebellum                      | 4.18993  | 6.51E-18 | 0.241998 | -9.26968 | 5.281581 | -0.70909 | 4.419129 |
| <b>ENSG00000156395.12</b> | SORCS3    | 1.02E-10 | 2      | 2 | 5.77E-11 | Brain_Nucleus_accumbens_basal_ganglia | 0.0002888   | Brain_Frontal_Cortex_BA9              | 1.295785 | 0.704215 | 0.704215 | -6.54958 | -3.62514 | -5.08736 | 2.067887 |
| <b>ENSG00000106460.18</b> | TMEM106B  | 3.76E-12 | 1<br>2 | 4 | 1.72E-13 | Brain_Nucleus_accumbens_basal_ganglia | 0.116000013 | Brain_Hippocampus                     | 8.855807 | 5.91E-17 | 0.553254 | 1.571787 | 7.369243 | 5.530825 | 1.742452 |
| <b>ENSG00000135655.15</b> | USP15     | 8.14E-06 | 1<br>3 | 5 | 5.88E-08 | Brain_Nucleus_accumbens_basal_ganglia | 0.811600003 | Brain_Amygdala                        | 8.409019 | 5.29E-18 | 0.495232 | -1.57206 | 5.422271 | 0.789667 | 2.142786 |
| <b>ENSG00000114316.12</b> | USP4      | 2.84E-10 | 1<br>3 | 2 | 3.71E-11 | Brain_Nucleus_accumbens_basal_ganglia | 0.460434149 | Brain_Frontal_Cortex_BA9              | 8.922654 | 3.71E-33 | 4.077346 | -6.61522 | 6.61522  | 1.438795 | 5.293083 |
| <b>ENSG00000100403.11</b> | ZC3H7B    | 1.50E-09 | 1<br>4 | 3 | 2.51E-11 | Brain_Nucleus_accumbens_basal_ganglia | 0.115876163 | Whole_Blood                           | 10.86176 | 1.44E-18 | 0.703643 | -1.57232 | 6.672594 | 5.248187 | 2.515477 |
| <b>ENSG00000186448.14</b> | ZNF197    | 3.11E-12 | 1<br>1 | 3 | 1.05E-14 | Brain_Nucleus_accumbens_basal_ganglia | 0.212899991 | Brain_Spinal_cord_cervical_c-1        | 8.768395 | 4.08E-17 | 0.726055 | -7.73333 | -1.24563 | -5.89294 | 1.942745 |
| <b>ENSG00000185219.16</b> | ZNF445    | 1.17E-10 | 7      | 4 | 1.01E-09 | Brain_Nucleus_accumbens_basal_ganglia | 0.802800001 | Brain_Cortex                          | 4.032293 | 5.16E-17 | 0.616199 | -6.10824 | 2.123763 | -3.77288 | 3.434803 |
| <b>ENSG00000145020.15</b> | AMT       | 9.47E-11 | 1<br>4 | 1 | 5.49E-12 | Brain_Putamen_basal_ganglia           | 2.34E-08    | Brain_Nucleus_accumbens_basal_ganglia | 13.58524 | 4.96E-18 | 13.58524 | -6.89233 | -5.5847  | -6.37773 | 0.37249  |
| <b>ENSG00000188938.15</b> | FAM120AOS | 2.62E-10 | 1<br>4 | 4 | 4.97E-09 | Brain_Putamen_basal_ganglia           | 0.703366301 | Brain_Cortex                          | 7.625982 | 3.83E-17 | 0.743036 | -5.84811 | -0.38078 | -4.2928  | 1.650213 |
| <b>ENSG00000233276.3</b>  | GPX1      | 1.22E-10 | 1<br>4 | 2 | 9.40E-12 | Brain_Putamen_basal_ganglia           | 2.00E-05    | Brain_Substantia_nigra                | 12.76948 | 1.58E-17 | 1.230518 | 4.264445 | 6.815465 | 6.247982 | 0.838306 |

|                           |               |          |        |   |          |                                |             |                                       |          |          |          |          |          |          |          |
|---------------------------|---------------|----------|--------|---|----------|--------------------------------|-------------|---------------------------------------|----------|----------|----------|----------|----------|----------|----------|
| <b>ENSG00000203809.6</b>  | LIN28B-AS1    | 8.64E-11 | 1<br>0 | 3 | 2.13E-12 | Brain_Putamen_basal_glia       | 1.67E-06    | Brain_Cortex                          | 9.232257 | 2.02E-19 | 0.342759 | 4.789446 | 7.025567 | 6.493217 | 0.671839 |
| <b>ENSG00000171206.13</b> | TRIM8         | 2.71E-05 | 9      | 3 | 7.62E-08 | Brain_Putamen_basal_glia       | 0.047530004 | Brain_Cortex                          | 6.10341  | 5.29E-17 | 0.755066 | 1.981547 | 5.375784 | 3.276428 | 1.263387 |
| <b>ENSG00000184357.4</b>  | HIST1H1B      | 2.90E-18 | 1      | 1 | 2.90E-18 | Brain_Spinal_cord_cervical_c-1 | 2.90E-18    | Brain_Spinal_cord_cervical_c-1        | 1        | 1        | 1        | -8.71522 | -8.71522 | -8.71522 | NA       |
| <b>ENSG00000274641.1</b>  | HIST1H2BO     | 2.36E-14 | 1      | 1 | 2.36E-14 | Brain_Spinal_cord_cervical_c-1 | 2.36E-14    | Brain_Spinal_cord_cervical_c-1        | 1        | 1        | 1        | -7.62921 | -7.62921 | -7.62921 | NA       |
| <b>ENSG00000163807.5</b>  | KIAA1143      | 4.83E-08 | 1<br>2 | 2 | 8.31E-09 | Brain_Spinal_cord_cervical_c-1 | 0.701599989 | Brain_Hypothalamus                    | 8.802409 | 9.78E-18 | 2.990539 | -0.38316 | 5.76201  | 3.141881 | 2.631822 |
| <b>ENSG00000185909.14</b> | KLHDC8B       | 2.57E-13 | 1<br>4 | 2 | 6.66E-14 | Brain_Spinal_cord_cervical_c-1 | 0.563400017 | Brain_Hypothalamus                    | 12.11752 | 3.41E-17 | 1.882483 | -0.62724 | 7.494488 | 3.635879 | 2.249181 |
| <b>ENSG00000281332.1</b>  | LINC00997     | 2.38E-06 | 1<br>3 | 4 | 1.09E-09 | Brain_Spinal_cord_cervical_c-1 | 1           | Brain_Caudate_basal_glia              | 9.262604 | 5.58E-17 | 0.720728 | -6.09535 | 0        | -1.47684 | 1.694056 |
| <b>ENSG00000204963.5</b>  | PCDHA7        | 3.86E-08 | 1<br>2 | 2 | 1.20E-08 | Brain_Spinal_cord_cervical_c-1 | 0.010439998 | Brain_Nucleus_accumbens_basal_ganglia | 10.73526 | 2.31E-17 | 0.700185 | -5.70001 | -2.5609  | -4.80898 | 0.914645 |
| <b>ENSG00000270039.1</b>  | RP11-571M6.17 | 2.79E-06 | 1<br>1 | 1 | 5.09E-08 | Brain_Spinal_cord_cervical_c-1 | 4.64E-06    | Brain_Anterior_cingulate_cortex_BA24  | 10.84805 | 2.17E-17 | 10.84805 | 4.58053  | 5.448207 | 4.659409 | 0.261615 |
| <b>ENSG00000134825.15</b> | TMEM258       | 1.06E-06 | 1<br>4 | 2 | 1.03E-08 | Brain_Spinal_cord_cervical_c-1 | 0.041260336 | Brain_Anterior_cingulate_cortex_BA24  | 12.15709 | 3.90E-17 | 1.638544 | 2.040904 | 5.725013 | 4.511588 | 0.845268 |
| <b>ENSG00000026950.16</b> | BTN3A1        | 5.60E-09 | 1<br>4 | 4 | 6.90E-09 | Brain_Substantia_nigra         | 0.68505847  | Brain_Cerebellum                      | 7.836423 | 1.44E-17 | 0.688631 | -5.79324 | 1.26297  | -2.43461 | 2.320232 |
| <b>ENSG00000260469.2</b>  | C15orf59-AS1  | 6.90E-09 | 1<br>2 | 2 | 2.11E-09 | Brain_Substantia_nigra         | 0.000160585 | Brain_Anterior_cingulate_cortex_BA24  | 10.46189 | 2.56E-18 | 0.850636 | 3.774102 | 5.989027 | 5.106102 | 0.652032 |
| <b>ENSG00000271904.1</b>  | CTC-498M16.4  | 4.94E-10 | 1<br>3 | 2 | 2.08E-12 | Brain_Substantia_nigra         | 0.036889998 | Brain_Caudate_basal_glia              | 11.44853 | 4.21E-18 | 1.252958 | 2.086979 | 7.028945 | 3.370863 | 1.639946 |
| <b>ENSG00000173402.11</b> | DAG1          | 3.07E-10 | 6      | 2 | 7.15E-11 | Brain_Substantia_nigra         | 0.322137869 | Brain_Caudate_basal_glia              | 4.089192 | 1.14E-16 | 1.794059 | -3.92293 | 6.517435 | 0.258213 | 3.993535 |
| <b>ENSG00000163412.12</b> | EIF4E3        | 4.48E-05 | 1<br>2 | 6 | 1.26E-07 | Brain_Substantia_nigra         | 0.9747      | Brain_Caudate_basal_glia              | 6.322834 | 0.000277 | 0.417479 | -1.38756 | 5.285007 | 0.546676 | 1.740576 |
| <b>ENSG00000227740.1</b>  | RP11-318C24.2 | 2.41E-11 | 6      | 3 | 5.48E-12 | Brain_Substantia_nigra         | 0.002472    | Brain_Cerebellar_Hemisphere           | 4.432767 | 0.004043 | 0.413114 | -6.89242 | -3.02675 | -5.84577 | 1.411563 |

|                           |               |          |        |   |          |                        |             |                                       |          |          |          |              |              |              |              |
|---------------------------|---------------|----------|--------|---|----------|------------------------|-------------|---------------------------------------|----------|----------|----------|--------------|--------------|--------------|--------------|
| <b>ENSG00000124201.14</b> | ZNFX1         | 1.30E-05 | 1<br>3 | 5 | 7.62E-08 | Brain_Substantia_nigra | 0.658389539 | Brain_Caudate_basal_ganglia           | 5.9047   | 4.90E-17 | 0.333059 | -<br>5.37593 | 3.186<br>477 | -<br>1.46238 | 3.305<br>523 |
| <b>ENSG00000196812.4</b>  | ZSCAN16       | 1.64E-10 | 1<br>3 | 4 | 5.01E-11 | Brain_Substantia_nigra | 0.444256104 | Brain_Putamen_basal_ganglia           | 7.745835 | 4.36E-18 | 0.28419  | -<br>6.50832 | 6.570<br>712 | 2.505<br>89  | 4.668<br>538 |
| <b>ENSG00000170209.4</b>  | ANKK1         | 5.41E-13 | 8<br>6 | 6 | 1.05E-15 | Whole_Blood            | 0.604400003 | Brain_Cerebellum                      | 4.100748 | 6.03E-18 | 0.230969 | -<br>8.02052 | 0.956<br>143 | -<br>3.41872 | 2.878<br>108 |
| <b>ENSG00000124508.16</b> | BTN2A2        | 9.54E-06 | 1<br>4 | 4 | 6.68E-09 | Whole_Blood            | 0.364099998 | Brain_Spinal_cord_cervical_c-1        | 9.36286  | 6.92E-17 | 0.959308 | -<br>5.79876 | -<br>0.90758 | -<br>1.82856 | 1.411<br>71  |
| <b>ENSG00000186470.13</b> | BTN3A2        | 4.61E-12 | 1<br>4 | 1 | 3.28E-13 | Whole_Blood            | 3.66E-06    | Brain_Cerebellum                      | 13.41296 | 3.58E-17 | 13.41296 | 4.629658     | 7.282489     | 6.753041     | 0.681908     |
| <b>ENSG00000273145.1</b>  | CITF22-92A6.1 | 1.04E-06 | 1<br>0 | 2 | 1.57E-07 | Whole_Blood            | 0.0004368   | Brain_Anterior_cingulate_cortex_BA24  | 9.433954 | 1.09E-17 | 0.566046 | -<br>5.24394 | 3.516<br>789 | 1.234<br>001 | 3.705<br>575 |
| <b>ENSG00000172409.5</b>  | CLP1          | 1.69E-09 | 4<br>3 | 3 | 5.66E-11 | Whole_Blood            | 0.009230997 | Brain_Anterior_cingulate_cortex_BA24  | 2.49699  | 0.003764 | 0.099605 | -<br>2.60338 | 6.552<br>452 | 2.728<br>242 | 3.856<br>45  |
| <b>ENSG00000172795.15</b> | DCP2          | 5.06E-06 | 1<br>4 | 4 | 2.23E-08 | Whole_Blood            | 0.350999985 | Brain_Spinal_cord_cervical_c-1        | 8.704993 | 1.16E-17 | 0.458165 | -<br>5.59298 | 2.974<br>256 | -<br>1.24982 | 2.300<br>186 |
| <b>ENSG00000178342.4</b>  | KCNG2         | 4.32E-08 | 8<br>8 | 8 | 1.78E-07 | Whole_Blood            | 0.577199983 | Brain_Nucleus_accumbens_basal_ganglia | 2.098009 | 0.147403 | 0.147403 | -<br>2.49207 | 5.220<br>845 | 0.294<br>343 | 2.431<br>385 |
| <b>ENSG00000172037.13</b> | LAMB2         | 8.39E-11 | 3<br>3 | 3 | 5.19E-10 | Whole_Blood            | 0.005884001 | Brain_Hippocampus                     | 1.274752 | 0.673032 | 0.673032 | 2.754177     | 6.21328      | 4.288962     | 1.762144     |
| <b>ENSG00000185920.15</b> | PTCH1         | 7.82E-07 | 7<br>3 | 3 | 1.29E-07 | Whole_Blood            | 0.768699992 | Brain_Amygdala                        | 3.122573 | 2.02E-17 | 1.668824 | -<br>4.52575 | 5.279<br>947 | 0.751<br>148 | 3.538<br>158 |
| <b>ENSG00000142599.17</b> | RERE          | 1.03E-11 | 6<br>3 | 3 | 5.33E-11 | Whole_Blood            | 0.081249998 | Brain_Caudate_basal_ganglia           | 4.351609 | 0.003074 | 0.449385 | -<br>6.56133 | -<br>1.74348 | -<br>4.84358 | 1.734<br>827 |
| <b>ENSG00000144306.14</b> | SCRN3         | 3.41E-07 | 1<br>3 | 3 | 2.26E-08 | Whole_Blood            | 0.972799999 | Brain_Cerebellar_Hemisphere           | 8.123769 | 2.42E-18 | 0.69662  | -<br>5.59064 | 0.494<br>38  | -<br>3.87156 | 1.904<br>437 |
| <b>ENSG00000145022.4</b>  | TCTA          | 2.56E-11 | 1<br>4 | 3 | 1.28E-11 | Whole_Blood            | 0.121457077 | Brain_Frontal_Cortex_BA9              | 10.15422 | 2.70E-17 | 0.88345  | -<br>6.77112 | 2.370<br>362 | -<br>3.72178 | 2.716<br>382 |
| <b>ENSG00000175274.18</b> | TP53I11       | 1.35E-05 | 1<br>0 | 7 | 7.84E-08 | Whole_Blood            | 0.951575645 | Brain_Cerebellar_Hemisphere           | 4.671072 | 7.63E-17 | 0.224006 | -<br>5.37077 | 4.568<br>876 | 0.634<br>057 | 2.608<br>656 |

|                          |        |          |        |   |          |             |            |                          |          |          |          |   |          |   |          |
|--------------------------|--------|----------|--------|---|----------|-------------|------------|--------------------------|----------|----------|----------|---|----------|---|----------|
| <b>ENSG00000197279.3</b> | ZNF165 | 3.10E-13 | 1<br>4 | 4 | 4.01E-11 | Whole_Blood | 0.95676415 | Brain_Putamen_basal_glia | 5.149643 | 8.91E-18 | 1.294564 | - | 6.251742 | - | 3.557102 |
| <b>ENSG00000144792.9</b> | ZNF660 | 1.26E-08 | 1<br>4 | 2 | 1.42E-09 | Whole_Blood | 0.00365459 | Brain_Cerebellum         | 13.13236 | 6.22E-18 | 0.62106  | - | -        | - | 0.738443 |

**Legend:**

|                                                               |
|---------------------------------------------------------------|
| gene: gene id                                                 |
| gene_name: gene HUGO name                                     |
| pvalue: p-value of S-MulTiXcan association                    |
| n: total number of single-tissue results for calculation      |
| n_indep: number of components kept after SVD thresholding     |
| p_i_best: best single-tissue p-value used                     |
| t_i_best: best single-tissue model used name                  |
| p_i_worst: worst single-tissue p-value used                   |
| t_i_worst: worst single-tissue model used name                |
| eigen_max: Maximum eigenvalue in the covariance matrix        |
| eigen_min: Minimum eigenvalue in the covariance matrix        |
| eigen_min_kept: Minimum eigenvalue that survived thresholding |
| z_min: Minimum single-tissue zscore used                      |
| z_max: Maximum single-tissue zscore used                      |
| z_mean: mean of single-tissue zscores used                    |
| z_sd: standard deviation of single-tissue zscores             |

**Table 2: SNPs that were prioritized using finemapping and functional annotation (CADD scores)(3)**

| SNP_ID     | Causal_Post._Prob. | CHR | BP        | P         | PHRED |
|------------|--------------------|-----|-----------|-----------|-------|
| rs1021362  | 1                  | 10  | 106611268 | 4.60E-19  | 12.76 |
| rs1021362  | 1                  | 10  | 106611268 | 4.60E-19  | 12.41 |
| rs174546   | 0.837038           | 11  | 61569830  | 7.25E-09  | 12.71 |
| rs11610143 | 0.368959           | 12  | 52349071  | 2.86E-09  | 17.63 |
| rs11612312 | 0.631041           | 12  | 52349088  | 2.26E-09  | 16.06 |
| rs904628   | 0.406742           | 12  | 121342084 | 4.35E-11  | 16.74 |
| rs904628   | 0.406742           | 12  | 121342084 | 4.35E-11  | 16.44 |
| rs9536381  | 0.499917           | 13  | 53860655  | 2.05E-15  | 11.74 |
| rs7229     | 0.369216           | 14  | 64692825  | 2.75E-10  | 11.21 |
| rs35641442 | 0.916466           | 14  | 75207263  | 1.63E-14  | 11.4  |
| rs2896460  | 0.319206           | 14  | 103306106 | 1.05E-08  | 12.04 |
| rs76119292 | 0.6267             | 17  | 27375598  | 3.18E-08  | 11.13 |
| rs8066520  | 0.999646           | 17  | 27376591  | 5.29E-08  | 14.42 |
| rs11082011 | 0.898497           | 18  | 35145122  | 2.72E-17  | 19.67 |
| rs56960323 | 0.406804           | 18  | 39304625  | 2.49E-08  | 15.73 |
| rs2717079  | 0.997559           | 2   | 58065936  | 8.01E-10  | 11.48 |
| rs7617480  | 1                  | 3   | 49210732  | 1.15E-14  | 15.13 |
| rs75363979 | 0.734688           | 4   | 35934578  | 0.0001194 | 13.08 |
| rs4626350  | 0.442219           | 5   | 30839451  | 1.52E-07  | 13.86 |
| rs2431108  | 0.587126           | 5   | 103947968 | 4.67E-14  | 20.8  |
| rs2408225  | 0.309848           | 5   | 124262051 | 2.20E-10  | 10.01 |

## Legend

|                                                                                                                                                                                                                                                                                                                                                                                                        |
|--------------------------------------------------------------------------------------------------------------------------------------------------------------------------------------------------------------------------------------------------------------------------------------------------------------------------------------------------------------------------------------------------------|
| SNP_ID: SNP                                                                                                                                                                                                                                                                                                                                                                                            |
| Causal_Post._Prob.: Causal Posterior Probability                                                                                                                                                                                                                                                                                                                                                       |
| CHR: Chromosome                                                                                                                                                                                                                                                                                                                                                                                        |
| BP: Base pair position                                                                                                                                                                                                                                                                                                                                                                                 |
| P: p-value of the phenotype                                                                                                                                                                                                                                                                                                                                                                            |
| PHRED: CADD score (Combined Annotation Dependent Depletion) : "a scaled C-score of greater or equal 10 indicates that these are predicted to be the 10% most deleterious substitutions that you can do to the human genome, a score of greater or equal 20 indicates the 1% most deleterious and so on". Source: <a href="https://cadd.gs.washington.edu/info">https://cadd.gs.washington.edu/info</a> |

**Table 3: Positional gene annotation of prioritized SNPs using  $\pm 100$  kb window (4)**

|    | Uploaded_variation | Location               | Allele | Consequence               | IMPACT   | SYMBOL         | Gene            |
|----|--------------------|------------------------|--------|---------------------------|----------|----------------|-----------------|
| 1  | rs1021362          | 10:106611268-106611268 | A      | intron_variant            | MODIFIER | SORCS3         | ENSG00000156395 |
| 2  | rs174546           | 11:61569830-61569830   | T      | upstream_gene_variant     | MODIFIER | RP11-467L20.10 | ENSG00000124915 |
| 3  | rs174546           | 11:61569830-61569830   | T      | downstream_gene_variant   | MODIFIER | DAGLA          | ENSG00000134780 |
| 4  | rs174546           | 11:61569830-61569830   | T      | upstream_gene_variant     | MODIFIER | FADS2          | ENSG00000134824 |
| 5  | rs174546           | 11:61569830-61569830   | T      | upstream_gene_variant     | MODIFIER | TMEM258        | ENSG00000134825 |
| 6  | rs174546           | 11:61569830-61569830   | T      | downstream_gene_variant   | MODIFIER | MYRF           | ENSG00000124920 |
| 7  | rs174546           | 11:61569830-61569830   | T      | downstream_gene_variant   | MODIFIER | FADS3          | ENSG00000221968 |
| 8  | rs174546           | 11:61569830-61569830   | T      | downstream_gene_variant   | MODIFIER | RAB31L1        | ENSG00000167994 |
| 9  | rs174546           | 11:61569830-61569830   | T      | downstream_gene_variant   | MODIFIER | FEN1           | ENSG00000168496 |
| 10 | rs174546           | 11:61569830-61569830   | T      | 3_prime_UTR_variant       | MODIFIER | FADS1          | ENSG00000149485 |
| 11 | rs174546           | 11:61569830-61569830   | T      | upstream_gene_variant     | MODIFIER | MIR611         | ENSG00000207601 |
| 12 | rs174546           | 11:61569830-61569830   | T      | downstream_gene_variant   | MODIFIER | MIR1908        | ENSG00000222326 |
| 13 | rs11610143         | 12:52349071-52349071   | G      | upstream_gene_variant     | MODIFIER | NR4A1          | ENSG00000123358 |
| 14 | rs11610143         | 12:52349071-52349071   | G      | intron_variant            | MODIFIER | ACVR1B         | ENSG00000135503 |
| 15 | rs11610143         | 12:52349071-52349071   | G      | upstream_gene_variant     | MODIFIER | GRASP          | ENSG00000161835 |
| 16 | rs11610143         | 12:52349071-52349071   | G      | downstream_gene_variant   | MODIFIER | ANKRD33        | ENSG00000167612 |
| 17 | rs11610143         | 12:52349071-52349071   | G      | upstream_gene_variant     | MODIFIER | RNU6-574P      | ENSG00000206992 |
| 18 | rs11610143         | 12:52349071-52349071   | G      | downstream_gene_variant   | MODIFIER | ACVRL1         | ENSG00000139567 |
| 19 | rs11610143         | 12:52349071-52349071   | G      | downstream_gene_variant   | MODIFIER | RP11-1100L3.4  | ENSG00000258021 |
| 20 | rs11610143         | 12:52349071-52349071   | G      | regulatory_region_variant | MODIFIER | -              | -               |
| 21 | rs11612312         | 12:52349088-52349088   | C      | upstream_gene_variant     | MODIFIER | NR4A1          | ENSG00000123358 |
| 22 | rs11612312         | 12:52349088-52349088   | C      | intron_variant            | MODIFIER | ACVR1B         | ENSG00000135503 |
| 23 | rs11612312         | 12:52349088-52349088   | C      | upstream_gene_variant     | MODIFIER | GRASP          | ENSG00000161835 |

|    |            |                        |   |                           |          |               |                 |
|----|------------|------------------------|---|---------------------------|----------|---------------|-----------------|
| 24 | rs11612312 | 12:52349088-52349088   | C | downstream_gene_variant   | MODIFIER | ANKRD33       | ENSG00000167612 |
| 25 | rs11612312 | 12:52349088-52349088   | C | upstream_gene_variant     | MODIFIER | RNU6-574P     | ENSG00000206992 |
| 26 | rs11612312 | 12:52349088-52349088   | C | downstream_gene_variant   | MODIFIER | ACVRL1        | ENSG00000139567 |
| 27 | rs11612312 | 12:52349088-52349088   | C | downstream_gene_variant   | MODIFIER | RP11-1100L3.4 | ENSG00000258021 |
| 28 | rs11612312 | 12:52349088-52349088   | C | regulatory_region_variant | MODIFIER | -             | -               |
| 29 | rs904628   | 12:121342084-121342084 | A | upstream_gene_variant     | MODIFIER | HNF1A         | ENSG00000135100 |
| 30 | rs904628   | 12:121342084-121342084 | A | downstream_gene_variant   | MODIFIER | C12orf43      | ENSG00000157895 |
| 31 | rs904628   | 12:121342084-121342084 | A | 5_prime_UTR_variant       | MODIFIER | SPPL3         | ENSG00000157837 |
| 32 | rs904628   | 12:121342084-121342084 | A | upstream_gene_variant     | MODIFIER | ARF1P2        | ENSG00000213137 |
| 33 | rs904628   | 12:121342084-121342084 | A | upstream_gene_variant     | MODIFIER | CLIC1P1       | ENSG00000231313 |
| 34 | rs904628   | 12:121342084-121342084 | A | downstream_gene_variant   | MODIFIER | HNF1A-AS1     | ENSG00000241388 |
| 35 | rs904628   | 12:121342084-121342084 | A | upstream_gene_variant     | MODIFIER | RPL12P33      | ENSG00000244585 |
| 36 | rs904628   | 12:121342084-121342084 | A | downstream_gene_variant   | MODIFIER | AC079602.1    | ENSG00000272214 |
| 37 | rs904628   | 12:121342084-121342084 | A | downstream_gene_variant   | MODIFIER | RP11-216P16.2 | ENSG00000271769 |
| 38 | rs904628   | 12:121342084-121342084 | A | regulatory_region_variant | MODIFIER | -             | -               |
| 39 | rs9536381  | 13:53860655-53860655   | T | downstream_gene_variant   | MODIFIER | AL450423.1    | ENSG00000220990 |
| 40 | rs9536381  | 13:53860655-53860655   | T | downstream_gene_variant   | MODIFIER | PCDH8P1       | ENSG00000225510 |
| 41 | rs9536381  | 13:53860655-53860655   | T | downstream_gene_variant   | MODIFIER | RN7SL618P     | ENSG00000241613 |
| 42 | rs7229     | 14:64692825-64692825   | A | downstream_gene_variant   | MODIFIER | ESR2          | ENSG00000140009 |
| 43 | rs7229     | 14:64692825-64692825   | A | 3_prime_UTR_variant       | MODIFIER | SYNE2         | ENSG00000054654 |
| 44 | rs35641442 | 14:75207263-75207263   | A | upstream_gene_variant     | MODIFIER | YLPM1         | ENSG00000119596 |
| 45 | rs35641442 | 14:75207263-75207263   | A | upstream_gene_variant     | MODIFIER | AC007956.1    | ENSG00000214670 |
| 46 | rs35641442 | 14:75207263-75207263   | A | downstream_gene_variant   | MODIFIER | FCF1          | ENSG00000119616 |
| 47 | rs35641442 | 14:75207263-75207263   | A | upstream_gene_variant     | MODIFIER | AREL1         | ENSG00000119682 |
| 48 | rs35641442 | 14:75207263-75207263   | A | downstream_gene_variant   | MODIFIER | SNORA7        | ENSG00000222604 |

|    |            |                        |   |                           |               |               |                     |
|----|------------|------------------------|---|---------------------------|---------------|---------------|---------------------|
| 49 | rs35641442 | 14:75207263-75207263   | A | downstream_gene_variant   | MODIFIER<br>R | RP11-173A8.2  | ENSG0000025843<br>9 |
| 50 | rs2896460  | 14:103306106-103306106 | T | upstream_gene_variant     | MODIFIER<br>R | AMN           | ENSG0000016612<br>6 |
| 51 | rs2896460  | 14:103306106-103306106 | T | intron_variant            | MODIFIER<br>R | TRAF3         | ENSG0000013132<br>3 |
| 52 | rs2896460  | 14:103306106-103306106 | T | downstream_gene_variant   | MODIFIER<br>R | CDC42BPB      | ENSG0000019875<br>2 |
| 53 | rs2896460  | 14:103306106-103306106 | T | upstream_gene_variant     | MODIFIER<br>R | RNU6-1316P    | ENSG0000020696<br>9 |
| 54 | rs2896460  | 14:103306106-103306106 | T | upstream_gene_variant     | MODIFIER<br>R | AL117209.1    | ENSG0000021199<br>0 |
| 55 | rs2896460  | 14:103306106-103306106 | T | upstream_gene_variant     | MODIFIER<br>R | snoU13        | ENSG0000023885<br>3 |
| 56 | rs2896460  | 14:103306106-103306106 | T | upstream_gene_variant     | MODIFIER<br>R | RP11-661D19.3 | ENSG0000025950<br>8 |
| 57 | rs2896460  | 14:103306106-103306106 | T | upstream_gene_variant     | MODIFIER<br>R | RP11-365N19.2 | ENSG0000025951<br>5 |
| 58 | rs76119292 | 17:27375598-27375598   | G | upstream_gene_variant     | MODIFIER<br>R | PHF12         | ENSG0000010911<br>8 |
| 59 | rs76119292 | 17:27375598-27375598   | G | upstream_gene_variant     | MODIFIER<br>R | SEZ6          | ENSG0000006301<br>5 |
| 60 | rs76119292 | 17:27375598-27375598   | G | intron_variant            | MODIFIER<br>R | PIPOX         | ENSG0000017976<br>1 |
| 61 | rs76119292 | 17:27375598-27375598   | G | downstream_gene_variant   | MODIFIER<br>R | MYO18A        | ENSG0000019653<br>5 |
| 62 | rs76119292 | 17:27375598-27375598   | G | downstream_gene_variant   | MODIFIER<br>R | TIAF1         | ENSG0000022199<br>5 |
| 63 | rs76119292 | 17:27375598-27375598   | G | downstream_gene_variant   | MODIFIER<br>R | AC024619.2    | ENSG0000023800<br>7 |
| 64 | rs76119292 | 17:27375598-27375598   | G | upstream_gene_variant     | MODIFIER<br>R | RP11-321A17.3 | ENSG0000026378<br>1 |
| 65 | rs76119292 | 17:27375598-27375598   | G | upstream_gene_variant     | MODIFIER<br>R | RP11-321A17.5 | ENSG0000026361<br>3 |
| 66 | rs76119292 | 17:27375598-27375598   | G | upstream_gene_variant     | MODIFIER<br>R | RP11-321A17.4 | ENSG0000026370<br>9 |
| 67 | rs76119292 | 17:27375598-27375598   | G | regulatory_region_variant | MODIFIER<br>R | -             | -                   |
| 68 | rs8066520  | 17:27376591-27376591   | A | upstream_gene_variant     | MODIFIER<br>R | PHF12         | ENSG0000010911<br>8 |
| 69 | rs8066520  | 17:27376591-27376591   | A | upstream_gene_variant     | MODIFIER<br>R | SEZ6          | ENSG0000006301<br>5 |
| 70 | rs8066520  | 17:27376591-27376591   | A | intron_variant            | MODIFIER<br>R | PIPOX         | ENSG0000017976<br>1 |
| 71 | rs8066520  | 17:27376591-27376591   | A | downstream_gene_variant   | MODIFIER<br>R | MYO18A        | ENSG0000019653<br>5 |
| 72 | rs8066520  | 17:27376591-27376591   | A | downstream_gene_variant   | MODIFIER<br>R | TIAF1         | ENSG0000022199<br>5 |
| 73 | rs8066520  | 17:27376591-27376591   | A | downstream_gene_variant   | MODIFIER<br>R | AC024619.2    | ENSG0000023800<br>7 |



|    |            |                      |   |                           |               |               |                     |
|----|------------|----------------------|---|---------------------------|---------------|---------------|---------------------|
| 74 | rs8066520  | 17:27376591-27376591 | A | upstream_gene_variant     | MODIFIER<br>R | RP11-321A17.3 | ENSG0000026378<br>1 |
| 75 | rs8066520  | 17:27376591-27376591 | A | upstream_gene_variant     | MODIFIER<br>R | RP11-321A17.5 | ENSG0000026361<br>3 |
| 76 | rs8066520  | 17:27376591-27376591 | A | upstream_gene_variant     | MODIFIER<br>R | RP11-321A17.4 | ENSG0000026370<br>9 |
| 77 | rs8066520  | 17:27376591-27376591 | A | regulatory_region_variant | MODIFIER<br>R | -             | -                   |
| 78 | rs11082011 | 18:35145122-35145122 | T | intron_variant            | MODIFIER<br>R | CELF4         | ENSG0000010148<br>9 |
| 79 | rs11082011 | 18:35145122-35145122 | T | upstream_gene_variant     | MODIFIER<br>R | MIR4318       | ENSG0000026653<br>0 |
| 80 | rs11082011 | 18:35145122-35145122 | T | regulatory_region_variant | MODIFIER<br>R | -             | -                   |
| 81 | rs56960323 | 18:39304625-39304625 | C | upstream_gene_variant     | MODIFIER<br>R | AC011225.1    | ENSG0000022525<br>3 |
| 82 | rs56960323 | 18:39304625-39304625 | C | downstream_gene_variant   | MODIFIER<br>R | RP11-188I24.1 | ENSG0000026765<br>2 |
| 83 | rs56960323 | 18:39304625-39304625 | C | upstream_gene_variant     | MODIFIER<br>R | RP11-142I20.1 | ENSG0000026731<br>3 |
| 84 | rs2717079  | 2:58065936-58065936  | A | upstream_gene_variant     | MODIFIER<br>R | VRK2          | ENSG0000002811<br>6 |
| 85 | rs2717079  | 2:58065936-58065936  | A | downstream_gene_variant   | MODIFIER<br>R | CTD-2026C7.1  | ENSG0000027161<br>5 |
| 86 | rs7617480  | 3:49210732-49210732  | C | upstream_gene_variant     | MODIFIER<br>R | CCDC36        | ENSG0000017342<br>1 |
| 87 | rs7617480  | 3:49210732-49210732  | C | upstream_gene_variant     | MODIFIER<br>R | LAMB2         | ENSG0000017203<br>7 |
| 88 | rs7617480  | 3:49210732-49210732  | C | upstream_gene_variant     | MODIFIER<br>R | USP19         | ENSG0000017204<br>6 |
| 89 | rs7617480  | 3:49210732-49210732  | C | upstream_gene_variant     | MODIFIER<br>R | QARS          | ENSG0000017205<br>3 |
| 90 | rs7617480  | 3:49210732-49210732  | C | upstream_gene_variant     | MODIFIER<br>R | CCDC71        | ENSG0000017735<br>2 |
| 91 | rs7617480  | 3:49210732-49210732  | C | intron_variant            | MODIFIER<br>R | KLHDC8B       | ENSG0000018590<br>9 |
| 92 | rs7617480  | 3:49210732-49210732  | C | downstream_gene_variant   | MODIFIER<br>R | C3orf62       | ENSG0000018831<br>5 |
| 93 | rs7617480  | 3:49210732-49210732  | C | upstream_gene_variant     | MODIFIER<br>R | QRICH1        | ENSG0000019821<br>8 |
| 94 | rs7617480  | 3:49210732-49210732  | C | upstream_gene_variant     | MODIFIER<br>R | Y_RNA         | ENSG0000019954<br>6 |
| 95 | rs7617480  | 3:49210732-49210732  | C | downstream_gene_variant   | MODIFIER<br>R | C3orf84       | ENSG0000023698<br>0 |
| 96 | rs7617480  | 3:49210732-49210732  | C | upstream_gene_variant     | MODIFIER<br>R | RP11-3B7.1    | ENSG0000022539<br>9 |
| 97 | rs7617480  | 3:49210732-49210732  | C | downstream_gene_variant   | MODIFIER<br>R | RN7SL182P     | ENSG0000024146<br>1 |
| 98 | rs7617480  | 3:49210732-49210732  | C | upstream_gene_variant     | MODIFIER<br>R | RP11-694I15.7 | ENSG0000027044<br>1 |

|            |            |                       |   |                                              |          |               |                 |
|------------|------------|-----------------------|---|----------------------------------------------|----------|---------------|-----------------|
| <b>99</b>  | rs7617480  | 3:49210732-49210732   | C | downstream_gene_variant                      | MODIFIER | RP11-3B7.7    | ENSG00000270538 |
| <b>100</b> | rs7617480  | 3:49210732-49210732   | C | regulatory_region_variant                    | MODIFIER | -             | -               |
| <b>101</b> | rs75363979 | 4:35934578-35934578   | C | downstream_gene_variant                      | MODIFIER | ARAP2         | ENSG00000047365 |
| <b>102</b> | rs4626350  | 5:30839451-30839451   | A | regulatory_region_variant                    | MODIFIER | -             | -               |
| <b>103</b> | rs2431108  | 5:103947968-103947968 | C | intron_variant,non_coding_transcript_variant | MODIFIER | RP11-6N13.1   | ENSG00000251574 |
| <b>104</b> | rs2431108  | 5:103947968-103947968 | C | regulatory_region_variant                    | MODIFIER | -             | -               |
| <b>105</b> | rs2408225  | 5:124262051-124262051 | C | downstream_gene_variant                      | MODIFIER | RP11-284A20.1 | ENSG00000249423 |
| <b>106</b> | rs2408225  | 5:124262051-124262051 | C | upstream_gene_variant                        | MODIFIER | RP11-284A20.2 | ENSG00000249261 |
| <b>107</b> | rs2408225  | 5:124262051-124262051 | C | downstream_gene_variant                      | MODIFIER | RP11-284A20.3 | ENSG00000248443 |

**Table 4: Colocalization analysis of genes and their specific tissue pairs (as reported from MetaXcan) which overlapped with genes identified from variant prioritization (5)**

| GENE               | GENE NAME  | PVAL UE  | N  | N_I NDE | P_I_BEST | T_I_BEST                              | PP.H0.A BF | PP.H1.A BF | PP.H2.A BF | PP.H3.A BF | PP.H4.ABF |                                        |
|--------------------|------------|----------|----|---------|----------|---------------------------------------|------------|------------|------------|------------|-----------|----------------------------------------|
| ENSG00000177352.9  | CCDC71     | 2.87E-09 | 13 | 1       | 1.07E-10 | Brain_Amygdala                        | 1.78E-09   | 6.19E-02   | 2.20E-10   | 6.75E-03   | 9.31E-01  | [1] "PP abf for shared variant: 93.1%" |
| ENSG00000139567.12 | ACVRL1     | 6.13E-07 | 4  | 3       | 9.85E-08 | Brain_Anterior_cingulate_cortex_BA24  | N/A        |            |            |            |           |                                        |
| ENSG00000225399.4  | RP11-3B7.1 | 6.77E-12 | 4  | 2       | 3.93E-10 | Brain_Anterior_cingulate_cortex_BA24  | 6.55E-09   | 1.83E-01   | 4.01E-09   | 1.12E-01   | 7.05E-01  | [1] "PP abf for shared variant: 70.5%" |
| ENSG00000101489.19 | CELF4      | 5.04E-14 | 12 | 6       | 1.13E-16 | Brain_Caudate_basal_ganglia           | N/A        |            |            |            |           |                                        |
| ENSG00000119616.11 | FCF1       | 9.15E-14 | 12 | 2       | 2.63E-14 | Brain_Caudate_basal_ganglia           | N/A        |            |            |            |           |                                        |
| ENSG00000149485.18 | FADS1      | 1.47E-06 | 14 | 2       | 4.33E-09 | Brain_Cerebellar_Hemisphere           | 3.78E-15   | 2.35E-12   | 5.63E-05   | 3.40E-02   | 9.66E-01  | [1] "PP abf for shared variant: 96.6%" |
| ENSG00000119682.16 | AREL1      | 1.46E-13 | 10 | 2       | 2.63E-14 | Brain_Cerebellum                      | N/A        |            |            |            |           |                                        |
| ENSG00000134824.13 | FADS2      | 1.58E-07 | 8  | 2       | 1.01E-08 | Brain_Cerebellum                      | N/A        |            |            |            |           |                                        |
| ENSG00000119596.17 | YLPM1      | 1.33E-12 | 5  | 2       | 1.41E-13 | Brain_Cortex                          | N/A        |            |            |            |           |                                        |
| ENSG00000157837.15 | SPPL3      | 1.10E-10 | 11 | 3       | 9.32E-12 | Brain_Frontal_Cortex_BA9              | 1.07E-07   | 1.05E-02   | 1.55E-06   | 1.50E-01   | 8.39E-01  | [1] "PP abf for shared variant: 83.9%" |
| ENSG00000221995.5  | TIAF1      | 3.07E-05 | 14 | 2       | 1.79E-07 | Brain_Hippocampus                     | 2.68E-06   | 8.17E-04   | 1.78E-03   | 5.42E-01   | 4.55E-01  | [1] "PP abf for shared variant: 45.5%" |
| ENSG00000131323.14 | TRAF3      | 2.48E-07 | 11 | 3       | 9.62E-08 | Brain_Hypothalamus                    | 2.73E-06   | 1.59E-03   | 8.18E-05   | 4.67E-02   | 9.52E-01  | [1] "PP abf for shared variant: 95.2%" |
| ENSG00000173421.16 | CCDC36     | 2.23E-11 | 11 | 3       | 2.41E-10 | Brain_Nucleus_accumbens_basal_ganglia | N/A        |            |            |            |           |                                        |
| ENSG00000156395.12 | SORCS3     | 1.02E-10 | 2  | 2       | 5.77E-11 | Brain_Nucleus_accumbens_basal_ganglia | N/A        |            |            |            |           |                                        |
| ENSG00000185909.14 | KLHDC8B    | 2.57E-13 | 14 | 2       | 6.66E-14 | Brain_Spinal_cord_cervical_c-1        | N/A        |            |            |            |           |                                        |
| ENSG00000134825.15 | TMEM258    | 1.06E-06 | 14 | 2       | 1.03E-08 | Brain_Spinal_cord_cervical_c-1        | N/A        |            |            |            |           |                                        |

|                    |       |          |   |   |          |             |          |          |          |          |          |                                        |
|--------------------|-------|----------|---|---|----------|-------------|----------|----------|----------|----------|----------|----------------------------------------|
| ENSG00000172037.13 | LAMB2 | 8.39E-11 | 3 | 3 | 5.19E-10 | Whole_Blood | 3.71E-07 | 8.55E-02 | 5.05E-07 | 1.16E-01 | 7.99E-01 | [1] "PP abf for shared variant: 79.9%" |
|--------------------|-------|----------|---|---|----------|-------------|----------|----------|----------|----------|----------|----------------------------------------|

## Legend

**#H0:** neither trait has a genetic association in the region

**#H1:** only trait 1 has a genetic association in the region

**#H2:** only trait 2 has a genetic association in the region

**#H3:** both traits are associated, but with different causal variants

**#H4:** both traits are associated and share a single causal variant

**gene:** Ensembl id

**gene\_name:** HUGO name

**pvalue:** p-value of the S-MultiXcan association

**n** number of S-PrediXcan results available for the gene

**n\_indep** number of independent components surviving SVD

**p\_i\_best** best p-value of S-PrediXcan

**t\_i\_best** tissue that presented best S-PrediXcan result

### Figures of genes with $H_4$ probability of $> \sim 80\%$

Each figure has three panels: Left-panel shows p-value of tissue eQTL on y-axis and GWAS on x-axis. The right panel shows the (top) GWAS-p-value (y-axis) and (bottom) eQTL-value (y-axis) and genomic position of the locus (x-axis). The most significant variant for GWAS and eQTL is annotated [[LocusCompare](#)].

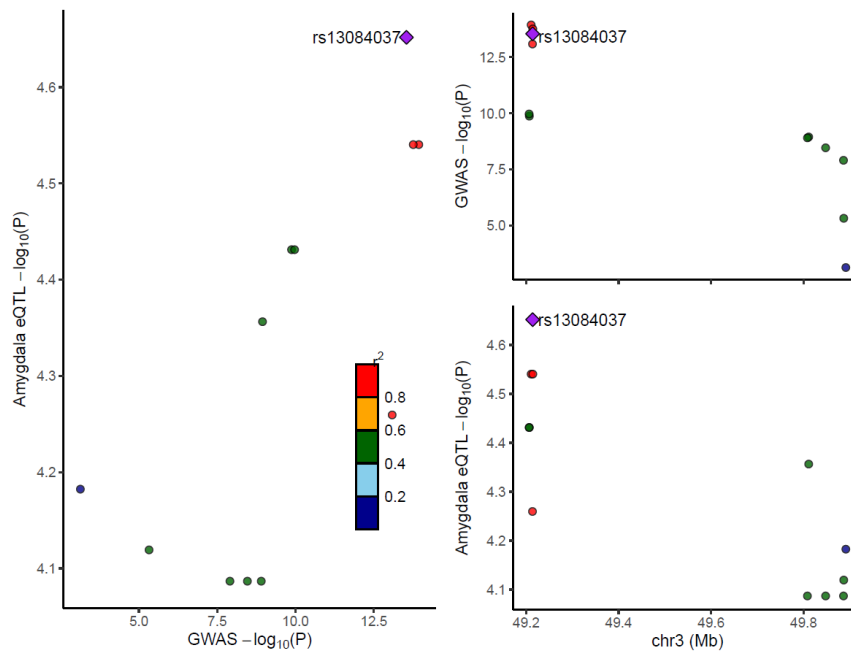

Figure 1: *CCDC71* - Amygdala

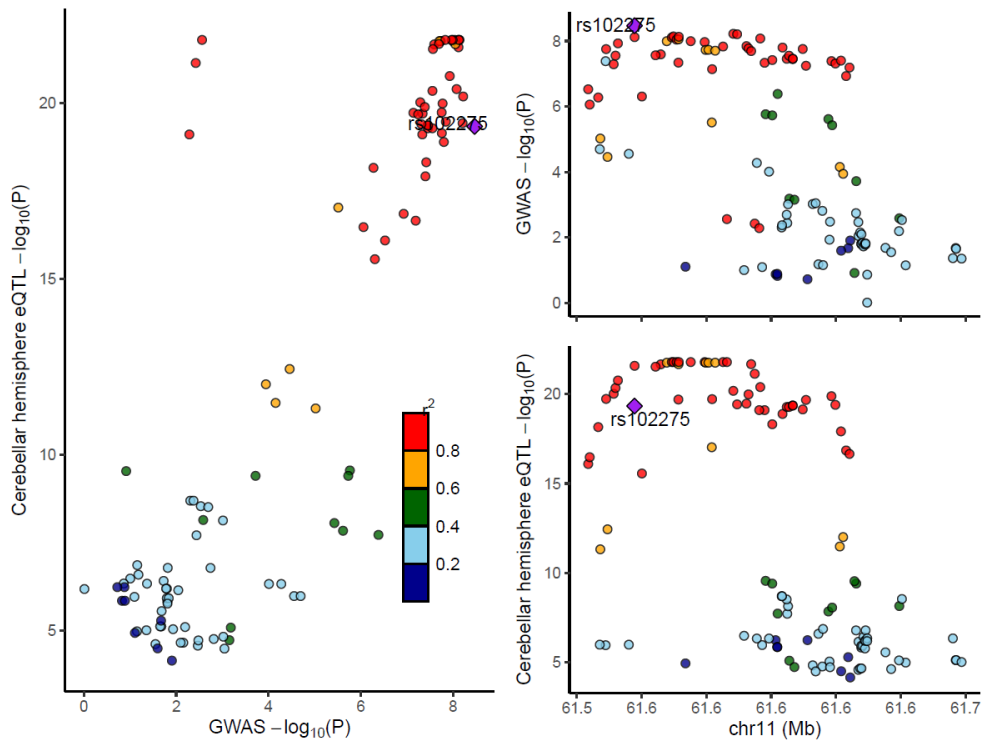

Figure 2: *FADS1* - Cerebellar hemisphere

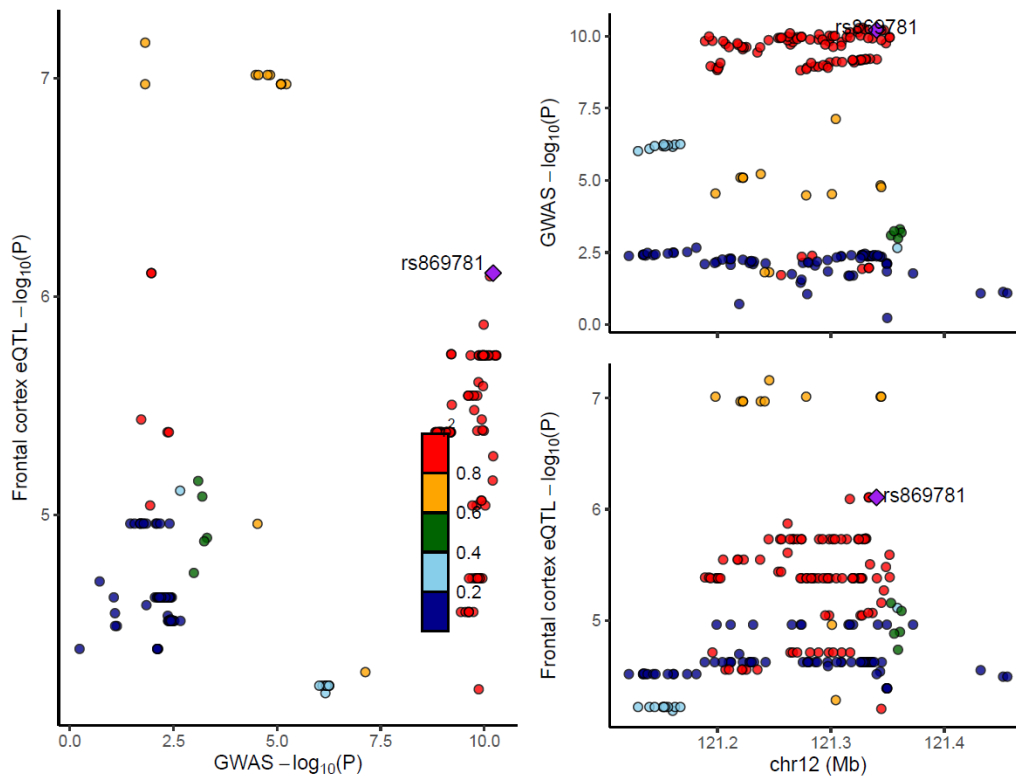

Figure 3: *SPPL3* - Frontal Cortex

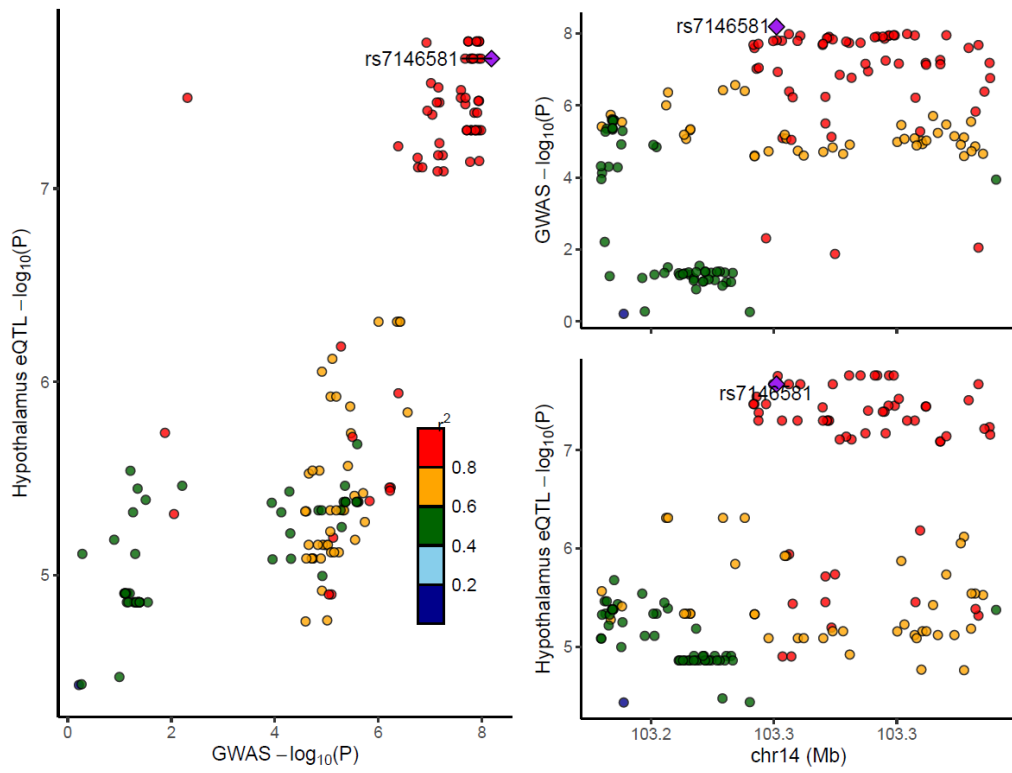

Figure 4: *TRAF3* - Hypothalamus

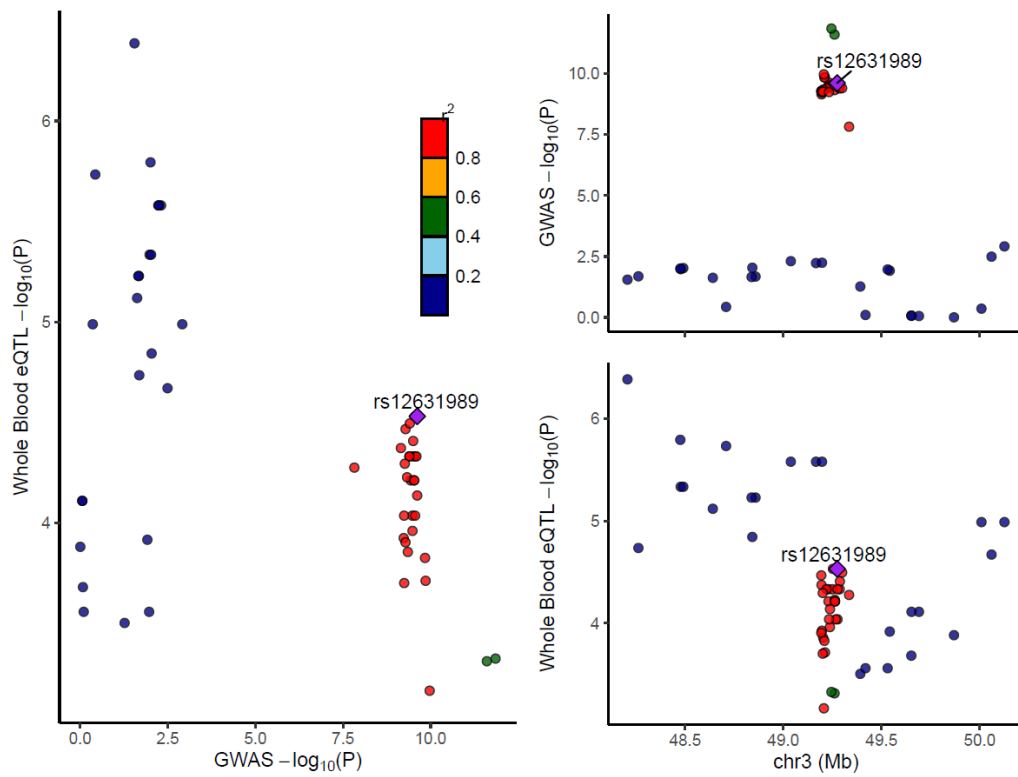

Figure 5: *LAMB2* - Whole blood

## References

1. Barbeira AN, Pividori M, Zheng J, Wheeler HE, Nicolae DL, Im HK. Integrating predicted transcriptome from multiple tissues improves association detection. *PLoS Genet.* 2019 Jan 22;15(1):e1007889.
2. Barbeira AN, Dickinson SP, Bonazzola R, Zheng J, Wheeler HE, Torres JM, et al. Exploring the phenotypic consequences of tissue specific gene expression variation inferred from GWAS summary statistics. *Nat Commun.* 2018 May 8;9(1):1825.
3. Rentzsch P, Witten D, Cooper GM, Shendure J, Kircher M. CADD: predicting the deleteriousness of variants throughout the human genome. *Nucleic Acids Res.* 2019 Jan 8;47(D1):D886–D894.
4. McLaren W, Gil L, Hunt SE, Riat HS, Ritchie GRS, Thormann A, et al. The ensembl variant effect predictor. *Genome Biol.* 2016 Jun 6;17(1):122.
5. Giambartolomei C, Zhenli Liu J, Zhang W, Hauberg M, Shi H, Boocock J, et al. A Bayesian framework for multiple trait colocalization from summary association statistics. *Bioinformatics.* 2018 Aug 1;34(15):2538–2545.
