# Supplementary material
Source: PubMed Central journal article supplement (PMC8404304)
Supplement: NIHMS1695113-supplement-Supplementary_Information.pdf [file NIHMS1695113-supplement-Supplementary_Information.pdf]

# Supplementary Information

## Figure S1. MAGMA Tissue Enrichment

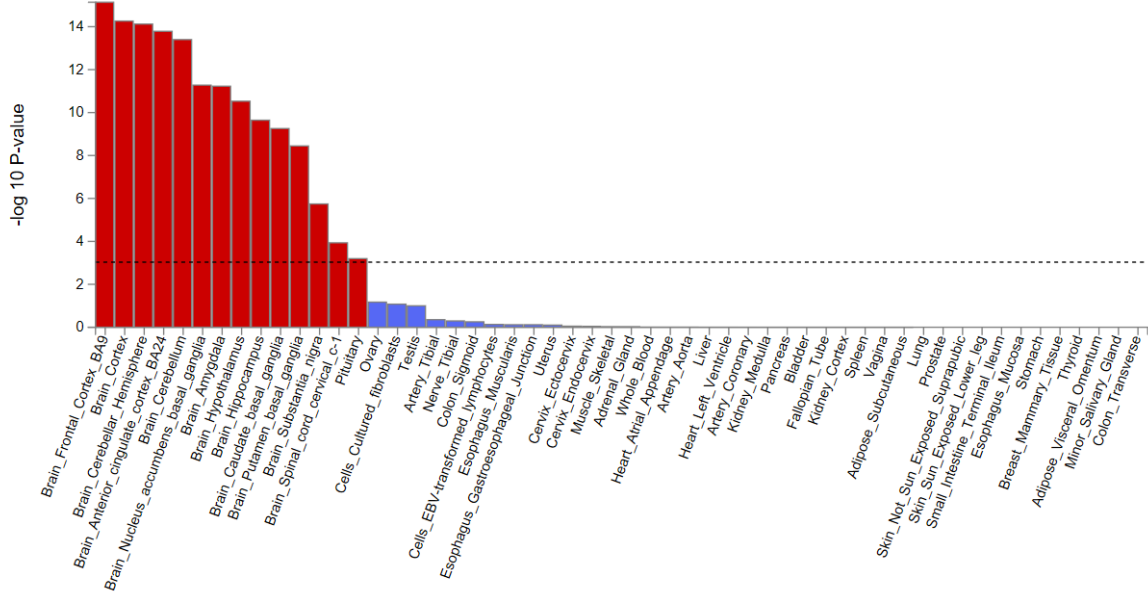

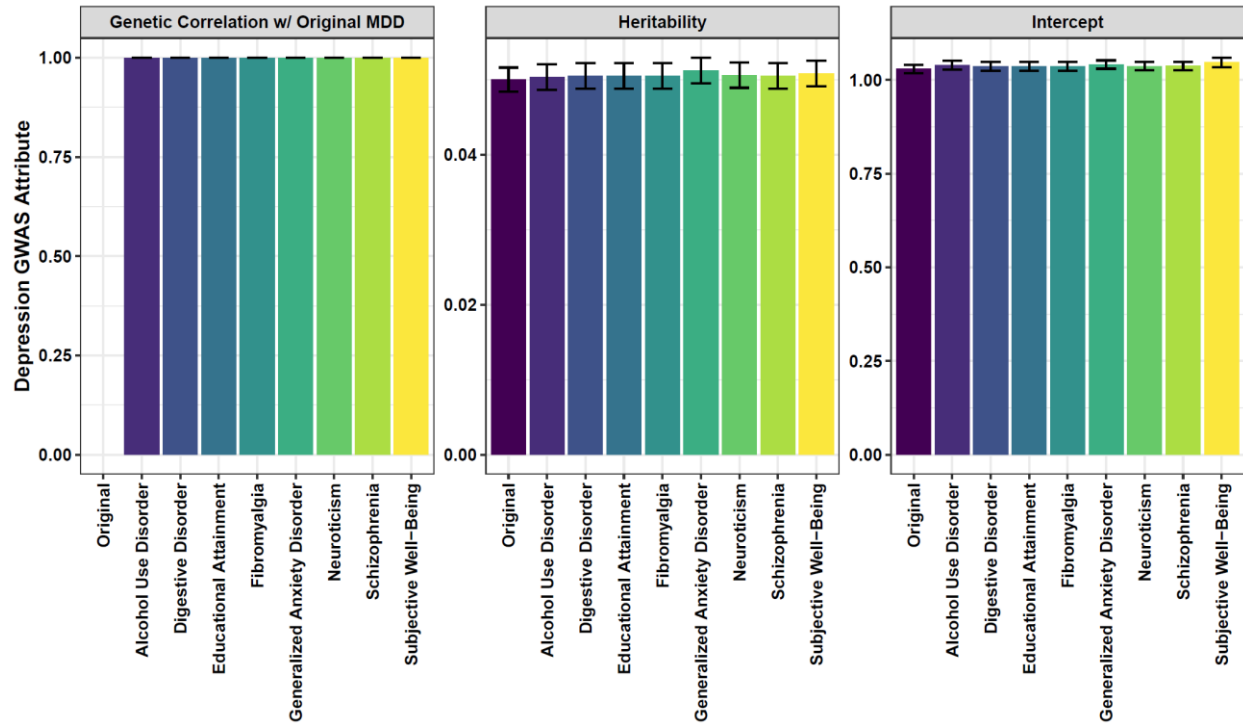

**Figure S2: Depression conditioned with comorbid conditions.** Genome-wide attributes of conditioned depression GWAS including heritability, linkage-disequilibrium (LD)-score intercept, genetic correlation between conditioned and unconditioned depression, and proportion of GWS SNPs retained after conditioning. Error bars represented standard errors surrounding each genetic correlation, heritability, and intercept point estimate. Sample size for each analysis is the same as the primary analysis,  $n=1,154,267$ .

Figure S3. Drug repurposing.

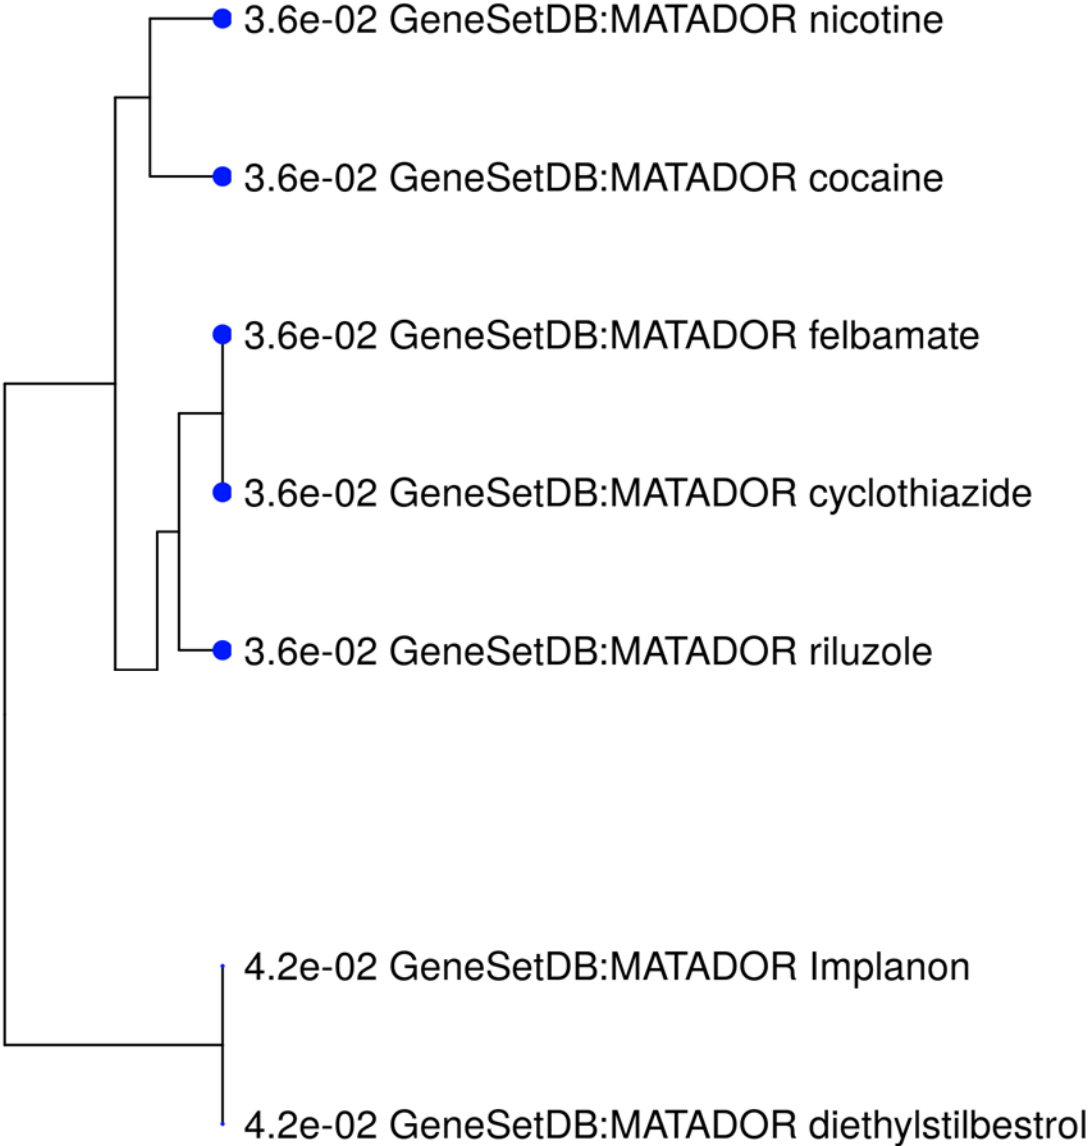

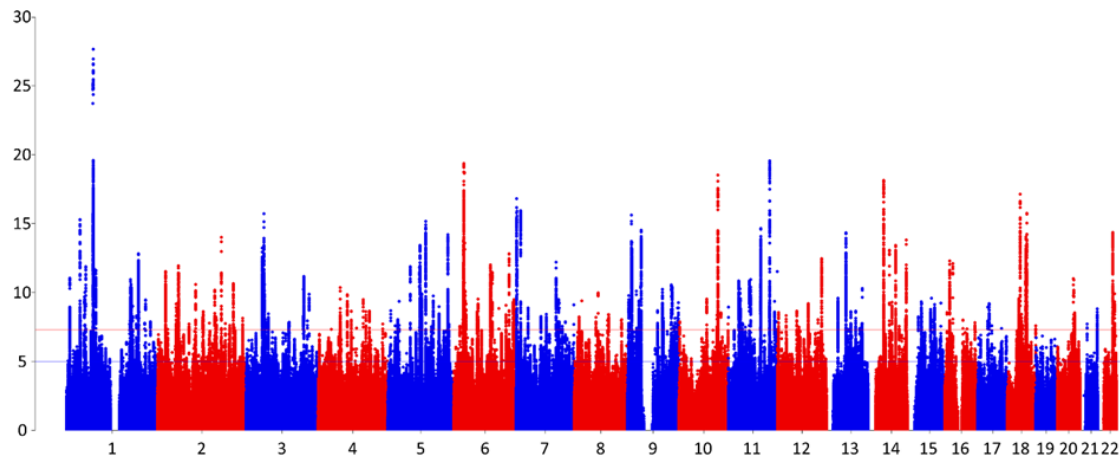

**Figure S4. Transancestry meta-analysis.** Manhattan plot for transancestry meta-analysis of MDD-META (n= 1,213,867).

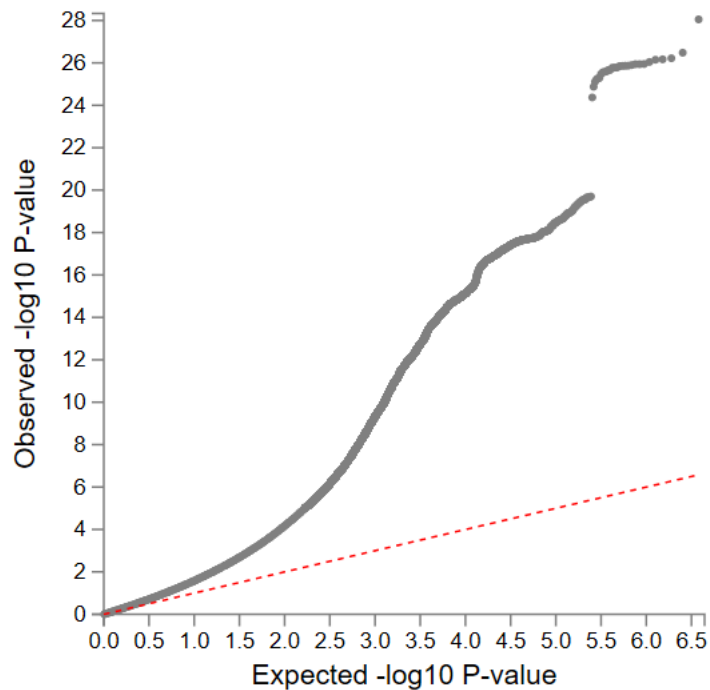

**Figure S5. QQ-plot for the MDD-META analysis.** Observed p-value is plotted on the y axis and expected p-value is plotted on the x axis. The red line represents a result with no inflation. LD-score regression showed that 97% of observed inflation is due to the high polygenicity of depression, with no evidence for inflation due to stratification or confounds indicated by the intercept (1.03, SE 0.011) or attenuation ratio (0.0297, SE 0.011).

**Table S1. Replication of findings from the primary meta-analysis by an independent 23andMe cohort of 1,342,778 participants.** 211 variants were available in the 23andMe cohort for testing. Of 211 variants tested, 209 (99%) had the same direction of effect, 192 showed at least nominal significance  $p < 0.05$  (91%), 144 remained significant after testing for multiple comparisons  $p < 0.05/211 = 2.37E-04$  (68%), and 81 were independently genome-wide significant  $p < 5E-08$  (38%). Only 2 SNPs were discordant, both with  $p > 0.05$  (0.9%). SNPs with only nominal significance are in italics, SNPs that survive multiple testing correction are in bold, and SNPs which were genome-wide significant in the independent cohort are bold and underlined. Tests were regressions with uncorrected 2-sided t-tests reported.

| rsid               | Ref Allele | MDD-META log(OR) | 23andMe Effect | MDD-META p-value | 23andMe p-value |
|--------------------|------------|------------------|----------------|------------------|-----------------|
| <u>rs11688767</u>  | A          | <u>-0.0214</u>   | <u>-0.0314</u> | <u>2.71E-13</u>  | <u>5.63E-32</u> |
| <u>rs11756123</u>  | A          | <u>0.0227</u>    | <u>0.0319</u>  | <u>2.35E-13</u>  | <u>1.56E-29</u> |
| <u>rs61902811</u>  | A          | <u>-0.0277</u>   | <u>-0.0304</u> | <u>5.90E-20</u>  | <u>7.42E-28</u> |
| <u>rs7531118</u>   | T          | <u>-0.0339</u>   | <u>-0.0286</u> | <u>8.90E-29</u>  | <u>1.96E-26</u> |
| <u>rs827120</u>    | A          | <u>0.0211</u>    | <u>0.0288</u>  | <u>8.21E-13</u>  | <u>2.39E-26</u> |
| <u>rs3756335</u>   | A          | <u>-0.0178</u>   | <u>-0.0281</u> | <u>1.59E-09</u>  | <u>9.15E-25</u> |
| <u>rs7523829</u>   | A          | <u>0.027</u>     | <u>0.0276</u>  | <u>3.99E-20</u>  | <u>2.06E-24</u> |
| <u>rs72839477</u>  | T          | <u>-0.0447</u>   | <u>-0.0501</u> | <u>1.87E-16</u>  | <u>3.92E-24</u> |
| <u>rs7988498</u>   | T          | <u>-0.0191</u>   | <u>-0.0271</u> | <u>8.44E-11</u>  | <u>5.01E-24</u> |
| <u>rs55649128</u>  | T          | <u>0.0239</u>    | <u>0.0271</u>  | <u>3.34E-15</u>  | <u>2.62E-22</u> |
| <u>rs67981811</u>  | C          | <u>0.0498</u>    | <u>0.0465</u>  | <u>1.99E-20</u>  | <u>5.38E-22</u> |
| <u>rs16909922</u>  | A          | <u>-0.0287</u>   | <u>-0.0439</u> | <u>1.39E-08</u>  | <u>6.21E-22</u> |
| <u>rs13186288</u>  | T          | <u>0.0176</u>    | <u>0.0261</u>  | <u>8.37E-09</u>  | <u>1.51E-20</u> |
| <u>rs301816</u>    | A          | <u>-0.0201</u>   | <u>-0.025</u>  | <u>1.85E-11</u>  | <u>3.78E-20</u> |
| <u>rs4702</u>      | A          | <u>-0.0183</u>   | <u>-0.0241</u> | <u>5.82E-10</u>  | <u>2.50E-19</u> |
| <u>rs7030813</u>   | T          | <u>0.0248</u>    | <u>0.0243</u>  | <u>5.10E-16</u>  | <u>1.84E-18</u> |
| <u>rs11135349</u>  | A          | <u>-0.0231</u>   | <u>-0.0234</u> | <u>3.12E-15</u>  | <u>2.66E-18</u> |
| <u>rs11772627</u>  | C          | <u>-0.0307</u>   | <u>-0.0291</u> | <u>2.45E-16</u>  | <u>4.97E-18</u> |
| <u>rs4632195</u>   | T          | <u>0.0227</u>    | <u>0.0231</u>  | <u>8.27E-15</u>  | <u>6.39E-18</u> |
| <u>rs113188507</u> | A          | <u>0.0223</u>    | <u>0.0263</u>  | <u>5.55E-12</u>  | <u>6.61E-18</u> |
| <u>rs3814424</u>   | T          | <u>0.0262</u>    | <u>0.0308</u>  | <u>3.63E-11</u>  | <u>7.06E-18</u> |
| <u>rs13204572</u>  | C          | <u>-0.0383</u>   | <u>-0.0443</u> | <u>7.67E-12</u>  | <u>8.13E-18</u> |
| <u>rs1806153</u>   | T          | <u>0.0234</u>    | <u>0.0276</u>  | <u>3.08E-11</u>  | <u>1.69E-17</u> |

|                   |          |                |                |                 |                 |
|-------------------|----------|----------------|----------------|-----------------|-----------------|
| <u>rs102275</u>   | <u>T</u> | <u>-0.0196</u> | <u>-0.0236</u> | <u>1.44E-10</u> | <u>3.47E-17</u> |
| <u>rs10973303</u> | <u>T</u> | <u>0.0298</u>  | <u>0.031</u>   | <u>2.33E-13</u> | <u>6.73E-17</u> |
| <u>rs7023933</u>  | <u>A</u> | <u>-0.0265</u> | <u>-0.0298</u> | <u>2.39E-11</u> | <u>8.07E-17</u> |
| <u>rs17186548</u> | <u>A</u> | <u>-0.0252</u> | <u>-0.027</u>  | <u>3.86E-12</u> | <u>1.60E-16</u> |
| <u>rs45534736</u> | <u>C</u> | <u>0.0418</u>  | <u>0.0503</u>  | <u>3.16E-10</u> | <u>2.81E-16</u> |
| <u>rs73581580</u> | <u>A</u> | <u>0.0407</u>  | <u>0.0427</u>  | <u>1.61E-10</u> | <u>3.24E-16</u> |
| <u>rs60157091</u> | <u>T</u> | <u>0.0213</u>  | <u>0.0212</u>  | <u>3.40E-13</u> | <u>2.86E-15</u> |
| <u>rs12635614</u> | <u>A</u> | <u>0.0187</u>  | <u>0.0214</u>  | <u>1.32E-10</u> | <u>3.04E-15</u> |
| <u>rs7200826</u>  | <u>T</u> | <u>0.0236</u>  | <u>0.0238</u>  | <u>1.85E-12</u> | <u>9.33E-15</u> |
| <u>rs9517313</u>  | <u>C</u> | <u>0.0199</u>  | <u>0.0214</u>  | <u>3.48E-11</u> | <u>2.16E-14</u> |
| <u>rs2369818</u>  | <u>T</u> | <u>0.0211</u>  | <u>0.0218</u>  | <u>3.55E-12</u> | <u>6.88E-14</u> |
| <u>rs12135327</u> | <u>T</u> | <u>0.0212</u>  | <u>0.02</u>    | <u>5.03E-13</u> | <u>8.34E-14</u> |
| <u>rs11674333</u> | <u>A</u> | <u>0.0207</u>  | <u>0.0201</u>  | <u>1.26E-12</u> | <u>8.36E-14</u> |
| <u>rs12967143</u> | <u>C</u> | <u>-0.0271</u> | <u>-0.0216</u> | <u>2.02E-17</u> | <u>1.12E-13</u> |
| <u>rs12517438</u> | <u>T</u> | <u>-0.0178</u> | <u>-0.0197</u> | <u>1.30E-09</u> | <u>1.75E-13</u> |
| <u>rs1267042</u>  | <u>T</u> | <u>0.0192</u>  | <u>0.0214</u>  | <u>7.31E-09</u> | <u>2.11E-13</u> |
| <u>rs10061069</u> | <u>C</u> | <u>-0.0224</u> | <u>-0.0234</u> | <u>5.24E-10</u> | <u>4.70E-13</u> |
| <u>rs4728354</u>  | <u>T</u> | <u>-0.0163</u> | <u>-0.0196</u> | <u>3.75E-08</u> | <u>5.69E-13</u> |
| <u>rs7809993</u>  | <u>C</u> | <u>-0.019</u>  | <u>-0.0193</u> | <u>2.48E-10</u> | <u>9.03E-13</u> |
| <u>rs4753209</u>  | <u>A</u> | <u>-0.0241</u> | <u>-0.0193</u> | <u>2.71E-15</u> | <u>1.25E-12</u> |
| <u>rs9775587</u>  | <u>T</u> | <u>0.0197</u>  | <u>0.0197</u>  | <u>5.54E-11</u> | <u>1.49E-12</u> |
| <u>rs2806933</u>  | <u>A</u> | <u>0.0236</u>  | <u>0.0193</u>  | <u>5.48E-15</u> | <u>2.19E-12</u> |
| <u>rs1054169</u>  | <u>A</u> | <u>0.0234</u>  | <u>0.0187</u>  | <u>1.58E-15</u> | <u>4.18E-12</u> |
| <u>rs4980365</u>  | <u>T</u> | <u>-0.0193</u> | <u>-0.0212</u> | <u>1.77E-08</u> | <u>7.33E-12</u> |
| <u>rs7940164</u>  | <u>T</u> | <u>-0.0205</u> | <u>-0.019</u>  | <u>4.53E-11</u> | <u>1.46E-11</u> |
| <u>rs17105472</u> | <u>A</u> | <u>-0.0317</u> | <u>-0.03</u>   | <u>4.27E-10</u> | <u>1.50E-11</u> |
| <u>rs35905305</u> | <u>T</u> | <u>-0.0202</u> | <u>-0.0181</u> | <u>5.46E-12</u> | <u>1.70E-11</u> |
| <u>rs7193263</u>  | <u>A</u> | <u>-0.0193</u> | <u>-0.0192</u> | <u>8.65E-10</u> | <u>2.36E-11</u> |
| <u>rs6536630</u>  | <u>A</u> | <u>-0.0177</u> | <u>-0.0179</u> | <u>1.41E-09</u> | <u>2.57E-11</u> |
| <u>rs74927570</u> | <u>T</u> | <u>-0.0225</u> | <u>-0.0233</u> | <u>3.25E-09</u> | <u>3.21E-11</u> |
| <u>rs4267411</u>  | <u>T</u> | <u>-0.0215</u> | <u>-0.0226</u> | <u>1.04E-08</u> | <u>4.06E-11</u> |
| <u>rs7617480</u>  | <u>A</u> | <u>0.0269</u>  | <u>0.0204</u>  | <u>9.42E-15</u> | <u>7.72E-11</u> |
| <u>rs3099439</u>  | <u>T</u> | <u>-0.0225</u> | <u>-0.0177</u> | <u>3.08E-14</u> | <u>8.44E-11</u> |

|                   |          |                |                |                 |                 |
|-------------------|----------|----------------|----------------|-----------------|-----------------|
| <u>rs61691222</u> | <u>T</u> | <u>0.0205</u>  | <u>0.0202</u>  | <u>2.95E-09</u> | <u>1.50E-10</u> |
| <u>rs835303</u>   | <u>T</u> | <u>-0.0235</u> | <u>-0.0211</u> | <u>5.96E-11</u> | <u>1.53E-10</u> |
| <u>rs6066242</u>  | <u>A</u> | <u>0.0202</u>  | <u>0.0183</u>  | <u>1.36E-10</u> | <u>1.53E-10</u> |
| <u>rs67455183</u> | <u>T</u> | <u>-0.024</u>  | <u>-0.0248</u> | <u>2.08E-08</u> | <u>1.57E-10</u> |
| <u>rs2322702</u>  | <u>A</u> | <u>-0.0184</u> | <u>-0.0174</u> | <u>8.05E-10</u> | <u>1.58E-10</u> |
| <u>rs1933802</u>  | <u>C</u> | <u>-0.0206</u> | <u>-0.017</u>  | <u>2.48E-12</u> | <u>2.55E-10</u> |
| <u>rs1484145</u>  | <u>T</u> | <u>0.0196</u>  | <u>0.0169</u>  | <u>1.99E-11</u> | <u>3.46E-10</u> |
| <u>rs3980104</u>  | <u>A</u> | <u>-0.0172</u> | <u>-0.0174</u> | <u>1.05E-08</u> | <u>4.77E-10</u> |
| <u>rs8138989</u>  | <u>T</u> | <u>-0.0192</u> | <u>-0.0181</u> | <u>2.90E-09</u> | <u>7.27E-10</u> |
| <u>rs12525684</u> | <u>A</u> | <u>-0.0188</u> | <u>-0.0163</u> | <u>1.43E-10</u> | <u>1.26E-09</u> |
| <u>rs7432943</u>  | <u>T</u> | <u>-0.0183</u> | <u>-0.0165</u> | <u>2.13E-09</u> | <u>1.28E-09</u> |
| <u>rs4478545</u>  | <u>A</u> | <u>-0.0197</u> | <u>-0.0181</u> | <u>2.31E-09</u> | <u>1.31E-09</u> |
| <u>rs7152906</u>  | <u>T</u> | <u>-0.0229</u> | <u>-0.0253</u> | <u>5.85E-15</u> | <u>1.48E-09</u> |
| <u>rs10441718</u> | <u>T</u> | <u>0.0195</u>  | <u>0.0164</u>  | <u>6.22E-11</u> | <u>1.60E-09</u> |
| <u>rs372519</u>   | <u>A</u> | <u>0.017</u>   | <u>0.0162</u>  | <u>2.64E-08</u> | <u>2.03E-09</u> |
| <u>rs2509805</u>  | <u>T</u> | <u>0.0217</u>  | <u>0.0172</u>  | <u>4.59E-12</u> | <u>2.48E-09</u> |
| <u>rs2274793</u>  | <u>T</u> | <u>-0.0219</u> | <u>-0.0171</u> | <u>1.97E-12</u> | <u>2.89E-09</u> |
| <u>rs2585399</u>  | <u>A</u> | <u>0.0169</u>  | <u>0.0164</u>  | <u>3.53E-08</u> | <u>3.52E-09</u> |
| <u>rs12003380</u> | <u>C</u> | <u>-0.0171</u> | <u>-0.016</u>  | <u>3.96E-08</u> | <u>4.60E-09</u> |
| <u>rs11614007</u> | <u>A</u> | <u>0.0221</u>  | <u>0.019</u>   | <u>2.12E-09</u> | <u>8.87E-09</u> |
| <u>rs1452787</u>  | <u>A</u> | <u>-0.0228</u> | <u>-0.0169</u> | <u>1.78E-12</u> | <u>9.21E-09</u> |
| <u>rs6012575</u>  | <u>C</u> | <u>0.0179</u>  | <u>0.0157</u>  | <u>1.20E-08</u> | <u>1.11E-08</u> |
| <u>rs2876520</u>  | <u>C</u> | <u>-0.0191</u> | <u>-0.0153</u> | <u>1.46E-10</u> | <u>1.50E-08</u> |
| <u>rs56059718</u> | <u>A</u> | <u>0.0227</u>  | <u>0.0189</u>  | <u>9.15E-10</u> | <u>2.08E-08</u> |
| <u>rs913930</u>   | <u>A</u> | <u>-0.0177</u> | <u>-0.0238</u> | <u>1.22E-08</u> | <u>4.52E-08</u> |
| <u>rs1021363</u>  | <u>A</u> | <u>0.0279</u>  | <u>0.0151</u>  | <u>1.16E-19</u> | <u>5.53E-08</u> |
| <u>rs779</u>      | <u>A</u> | <u>-0.0261</u> | <u>-0.0223</u> | <u>1.44E-08</u> | <u>5.97E-08</u> |
| <u>rs12967855</u> | <u>A</u> | <u>0.0267</u>  | <u>0.0155</u>  | <u>3.49E-17</u> | <u>6.45E-08</u> |
| <u>rs55650481</u> | <u>T</u> | <u>-0.0259</u> | <u>-0.0229</u> | <u>4.05E-08</u> | <u>6.87E-08</u> |
| <u>rs1848393</u>  | <u>A</u> | <u>-0.0192</u> | <u>-0.0147</u> | <u>4.23E-10</u> | <u>8.31E-08</u> |
| <u>rs17737641</u> | <u>A</u> | <u>-0.0582</u> | <u>-0.0396</u> | <u>2.49E-12</u> | <u>9.62E-08</u> |
| <u>rs75581564</u> | <u>A</u> | <u>0.0283</u>  | <u>0.0224</u>  | <u>6.85E-10</u> | <u>1.14E-07</u> |
| <u>rs10805794</u> | <u>A</u> | <u>-0.0166</u> | <u>-0.0141</u> | <u>2.20E-08</u> | <u>1.49E-07</u> |

|             |   |         |         |          |          |
|-------------|---|---------|---------|----------|----------|
| rs11681373  | A | 0.0168  | 0.0144  | 1.65E-08 | 1.50E-07 |
| rs12705593  | T | -0.0209 | -0.0143 | 4.66E-12 | 1.62E-07 |
| rs150027890 | A | 0.0424  | 0.0341  | 4.75E-09 | 1.73E-07 |
| rs34727251  | A | -0.018  | -0.0153 | 2.24E-08 | 2.19E-07 |
| rs1950829   | A | 0.0239  | 0.0215  | 2.91E-16 | 2.76E-07 |
| rs11686891  | A | -0.0214 | -0.0138 | 4.92E-13 | 2.93E-07 |
| rs148466862 | T | 0.0507  | 0.0339  | 4.94E-12 | 3.76E-07 |
| rs56211578  | A | -0.0235 | -0.0184 | 1.17E-08 | 5.09E-07 |
| rs61127279  | A | 0.0192  | 0.014   | 8.95E-10 | 6.02E-07 |
| rs58243949  | T | -0.0245 | -0.0164 | 4.13E-12 | 6.89E-07 |
| rs13296641  | A | -0.0204 | -0.0143 | 8.65E-11 | 7.64E-07 |
| rs2592105   | C | -0.0168 | -0.0138 | 4.51E-08 | 1.11E-06 |
| rs145678014 | T | -0.0471 | -0.0328 | 2.71E-10 | 1.42E-06 |
| rs16841842  | A | -0.0265 | -0.0244 | 1.03E-13 | 1.66E-06 |
| rs146791497 | T | 0.0389  | 0.0303  | 1.64E-08 | 1.67E-06 |
| rs10987507  | A | -0.0185 | -0.0144 | 3.10E-08 | 2.00E-06 |
| rs387627    | T | 0.0198  | 0.0142  | 2.31E-09 | 2.15E-06 |
| rs10026036  | A | 0.0177  | 0.0131  | 4.44E-09 | 2.39E-06 |
| rs1038093   | T | 0.0184  | 0.0131  | 1.37E-09 | 2.54E-06 |
| rs66511648  | T | -0.0189 | -0.014  | 9.50E-09 | 2.73E-06 |
| rs111471551 | A | -0.0342 | -0.0234 | 8.19E-10 | 2.93E-06 |
| rs118109745 | A | -0.0811 | -0.0593 | 6.76E-10 | 3.14E-06 |
| rs4131791   | T | -0.0226 | -0.0125 | 3.04E-14 | 4.57E-06 |
| rs7589705   | T | 0.0386  | 0.0273  | 2.76E-08 | 4.58E-06 |
| rs3088142   | T | 0.019   | 0.0193  | 1.36E-10 | 4.78E-06 |
| rs7837935   | T | -0.0274 | -0.0174 | 2.13E-11 | 5.23E-06 |
| rs61935769  | A | -0.0173 | -0.0128 | 1.13E-08 | 5.60E-06 |
| rs7534271   | C | 0.0165  | 0.0123  | 3.42E-08 | 7.32E-06 |
| rs34165207  | A | 0.0194  | 0.0118  | 1.01E-10 | 1.19E-05 |
| rs12102100  | A | 0.0198  | 0.0184  | 5.04E-11 | 1.60E-05 |
| rs1837713   | A | 0.0232  | 0.0133  | 8.68E-12 | 2.10E-05 |
| rs35023999  | A | 0.0196  | 0.0113  | 2.16E-11 | 2.33E-05 |
| rs2060337   | T | 0.0166  | 0.0114  | 3.05E-08 | 2.73E-05 |



|             |   |         |         |          |             |
|-------------|---|---------|---------|----------|-------------|
| rs667138    | A | -0.0256 | -0.0155 | 2.48E-09 | 3.14E-05    |
| rs1414592   | C | -0.0164 | -0.011  | 2.04E-08 | 3.74E-05    |
| rs2062479   | C | 0.0167  | 0.0111  | 3.00E-08 | 4.47E-05    |
| rs3793577   | A | -0.0195 | -0.0171 | 2.43E-11 | 4.76E-05    |
| rs13319803  | A | -0.0217 | -0.0174 | 4.17E-13 | 4.99E-05    |
| rs57389877  | A | 0.0167  | 0.0109  | 2.05E-08 | 5.28E-05    |
| rs11644513  | T | -0.0172 | -0.0114 | 3.60E-08 | 5.42E-05    |
| rs2418449   | T | 0.0223  | 0.0119  | 5.55E-12 | 5.67E-05    |
| rs4971586   | A | -0.0178 | -0.0106 | 1.20E-09 | 7.77E-05    |
| rs4846898   | A | -0.0165 | -0.0108 | 2.95E-08 | 8.11E-05    |
| rs75122126  | T | 0.0629  | 0.0367  | 3.03E-09 | 0.000103029 |
| rs61903989  | T | -0.0447 | -0.0272 | 6.24E-09 | 0.000103084 |
| rs1437336   | T | -0.0272 | -0.0169 | 2.25E-08 | 0.000104391 |
| rs169235    | A | -0.02   | -0.012  | 6.50E-09 | 0.000104872 |
| rs422907    | A | -0.0175 | -0.0107 | 1.06E-08 | 0.000114402 |
| rs7017108   | T | 0.0177  | 0.0104  | 2.48E-09 | 0.000123837 |
| rs2408225   | T | 0.0186  | 0.0104  | 2.48E-10 | 0.000132009 |
| rs4785307   | A | 0.0169  | 0.0104  | 3.76E-08 | 0.00015257  |
| rs1152578   | T | -0.0183 | -0.0101 | 4.61E-10 | 0.000176494 |
| rs728017    | A | -0.0185 | -0.0161 | 5.87E-10 | 0.000191811 |
| rs151286028 | A | 0.0251  | 0.0125  | 9.46E-09 | 0.000213961 |
| rs57344483  | A | -0.0334 | -0.0188 | 5.86E-09 | 0.00023436  |
| rs12959940  | A | 0.0268  | 0.0156  | 6.55E-09 | 0.00024793  |
| rs78337797  | T | 0.027   | 0.0191  | 4.65E-09 | 0.00033103  |
| rs72704544  | A | -0.0215 | -0.0119 | 7.26E-09 | 0.00036516  |
| rs7564151   | C | -0.0183 | -0.0096 | 1.87E-09 | 0.00045879  |
| rs993885    | A | 0.0174  | 0.0151  | 2.36E-08 | 0.00046576  |
| rs9458641   | A | -0.0219 | -0.0114 | 7.89E-10 | 0.00047774  |
| rs17822102  | A | 0.0171  | 0.0098  | 2.77E-08 | 0.00051586  |
| rs12926421  | A | 0.022   | 0.0144  | 8.96E-10 | 0.00052757  |
| rs4776729   | A | -0.0278 | -0.0135 | 1.54E-10 | 0.00053664  |
| rs612823    | T | 0.0217  | 0.0096  | 2.09E-12 | 0.00056238  |
| rs1006737   | A | 0.0175  | 0.0097  | 1.17E-08 | 0.00058167  |

|                    |   |         |         |          |            |
|--------------------|---|---------|---------|----------|------------|
| <i>rs28406450</i>  | A | -0.0172 | -0.0092 | 9.21E-09 | 0.00075174 |
| <i>rs35553410</i>  | T | -0.0206 | -0.0104 | 2.39E-09 | 0.00081353 |
| <i>rs9671376</i>   | T | 0.0203  | 0.0137  | 6.16E-09 | 0.00088614 |
| <i>rs61914045</i>  | A | 0.0212  | 0.011   | 6.52E-09 | 0.00089441 |
| <i>rs6472981</i>   | T | -0.0243 | -0.0155 | 4.14E-08 | 0.00100325 |
| <i>rs68170059</i>  | T | -0.02   | -0.01   | 7.26E-09 | 0.00126251 |
| <i>rs2582897</i>   | T | 0.0209  | 0.0087  | 8.15E-12 | 0.0015667  |
| <i>rs4937872</i>   | A | -0.018  | -0.0087 | 2.62E-09 | 0.00174179 |
| <i>rs193085025</i> | T | 0.0186  | 0.0087  | 4.87E-09 | 0.00191826 |
| <i>rs1597076</i>   | A | 0.0172  | 0.0087  | 4.85E-08 | 0.00213804 |
| <i>rs2881971</i>   | C | 0.0194  | 0.009   | 1.43E-09 | 0.00227707 |
| <i>rs2576241</i>   | A | -0.0182 | -0.0127 | 6.52E-10 | 0.00235118 |
| <i>rs972189</i>    | T | 0.0206  | 0.0083  | 1.82E-11 | 0.00257341 |
| <i>rs62170849</i>  | T | 0.0196  | 0.0089  | 1.45E-09 | 0.00262104 |
| <i>rs79104582</i>  | A | -0.0293 | -0.0133 | 3.71E-08 | 0.00276618 |
| <i>rs4943314</i>   | T | -0.0233 | -0.01   | 1.65E-10 | 0.00291422 |
| <i>rs8180817</i>   | C | -0.019  | -0.008  | 1.77E-10 | 0.00316619 |
| <i>rs7561603</i>   | A | 0.0166  | 0.0079  | 2.22E-08 | 0.00317539 |
| <i>rs7101595</i>   | T | 0.0163  | 0.0077  | 2.86E-08 | 0.00404599 |
| <i>rs13031157</i>  | T | 0.0172  | 0.0077  | 6.56E-09 | 0.00429667 |
| <i>rs10149470</i>  | A | -0.0231 | -0.0097 | 1.21E-14 | 0.00485789 |
| <i>rs72710803</i>  | A | -0.0354 | -0.0136 | 2.18E-11 | 0.00502361 |
| <i>rs11686677</i>  | T | 0.0211  | 0.0146  | 1.09E-08 | 0.00568261 |
| <i>rs997934</i>    | T | 0.018   | 0.0118  | 1.58E-09 | 0.00619321 |
| <i>rs72925321</i>  | A | -0.0365 | -0.0161 | 1.32E-08 | 0.00625947 |
| <i>rs13295668</i>  | C | -0.024  | -0.0093 | 3.56E-08 | 0.00770432 |
| <i>rs1466887</i>   | T | -0.0169 | -0.0072 | 1.59E-08 | 0.00779882 |
| <i>rs4628229</i>   | T | -0.0202 | -0.0077 | 6.36E-10 | 0.00905882 |
| <i>rs1637736</i>   | T | -0.0178 | -0.0072 | 1.00E-08 | 0.00973912 |
| <i>rs487385</i>    | T | -0.02   | -0.0084 | 2.04E-08 | 0.01107473 |
| <i>rs28562465</i>  | T | 0.0161  | 0.0067  | 4.58E-08 | 0.01180372 |
| <i>rs6695276</i>   | T | 0.0315  | 0.0122  | 2.65E-08 | 0.01771946 |
| <i>rs112181005</i> | A | -0.025  | -0.0091 | 2.77E-08 | 0.02189729 |

|             |   |         |         |          |             |
|-------------|---|---------|---------|----------|-------------|
| rs8030745   | T | 0.0271  | 0.0978  | 2.70E-09 | 0.02257566  |
| rs2214123   | A | 0.0198  | 0.0064  | 1.72E-10 | 0.02330805  |
| rs17115122  | A | 0.0258  | 0.0139  | 9.06E-07 | 0.03617811  |
| rs11191499  | T | 0.032   | 0.0096  | 2.12E-08 | 0.04276637  |
| rs6471757   | A | -0.0183 | -0.0069 | 2.47E-09 | 0.051124463 |
| rs2298969   | A | 0.0169  | 0.0078  | 2.21E-08 | 0.062179627 |
| rs6551772   | A | -0.0177 | -0.0047 | 2.18E-09 | 0.078383056 |
| rs324300    | A | 0.0176  | 0.0049  | 4.23E-09 | 0.079289754 |
| rs10786815  | A | 0.0201  | 0.0058  | 3.13E-08 | 0.082518484 |
| rs1246683   | A | 0.0434  | 0.0107  | 6.32E-09 | 0.101070391 |
| rs10858298  | A | -0.0194 | -0.0049 | 4.03E-09 | 0.104068736 |
| rs72696282  | A | -0.0425 | -0.0132 | 9.02E-10 | 0.109714725 |
| rs11065505  | T | -0.0249 | -0.0058 | 8.09E-09 | 0.116135206 |
| rs114851235 | A | -0.0462 | -0.0098 | 1.07E-10 | 0.124234514 |
| rs1261070   | A | -0.0362 | -0.0099 | 8.93E-11 | 0.192013886 |
| rs57022387  | T | -0.0285 | -0.0054 | 2.96E-09 | 0.212347737 |
| rs9074      | A | 0.0229  | -0.0766 | 3.73E-12 | 0.286605715 |
| rs6512258   | T | 0.0187  | 0.0023  | 3.28E-08 | 0.463239632 |
| rs73225543  | T | 0.0374  | 0.004   | 4.63E-08 | 0.505736388 |
| rs2888018   | T | -0.0183 | -0.0025 | 4.38E-09 | 0.570999767 |
| rs150924233 | T | -0.1016 | -0.0073 | 3.99E-08 | 0.599990254 |
| rs35975963  | A | 0.0348  | -0.0012 | 1.69E-08 | 0.822933364 |
| rs3904715   | A | 0.0315  | 0.0009  | 2.53E-08 | 0.862748031 |
| rs1931388   | A | 0.0242  | NA      | 9.19E-16 | NA          |
| rs5995992   | T | -0.0257 | NA      | 4.37E-15 | NA          |
| rs1002656   | T | -0.0252 | NA      | 4.59E-15 | NA          |
| rs12530388  | A | 0.0204  | NA      | 2.81E-12 | NA          |
| rs10913112  | T | -0.0221 | NA      | 3.20E-12 | NA          |
| rs11579246  | A | 0.0328  | NA      | 9.51E-11 | NA          |
| rs1415118   | T | -0.0183 | NA      | 5.23E-10 | NA          |
| rs11911     | A | 0.0175  | NA      | 4.66E-09 | NA          |
| rs2466367   | T | 0.0173  | NA      | 2.71E-08 | NA          |
| rs7026627   | T | 0.0171  | NA      | 3.29E-08 | NA          |

**Table S2. Top Eight Gene Ontology Biological Processes.** 219 Biological processes had an FDR < 0.05. The top eight processes with FDR <  $1 \times 10^{-4}$  are included here, the rest of the processes are reported in the supplemental data. False discovery rate was used to account for multiple comparisons.

| Enrichment FDR         | Genes in list | Total genes | Functional Category                                             |
|------------------------|---------------|-------------|-----------------------------------------------------------------|
| $1.20 \times 10^{-10}$ | 96            | 2474        | Nervous system development                                      |
| $9.75 \times 10^{-9}$  | 21            | 182         | Synapse assembly                                                |
| $9.75 \times 10^{-9}$  | 32            | 434         | Synapse organization                                            |
| $2.74 \times 10^{-8}$  | 25            | 282         | Cell-cell adhesion via plasma-membrane adhesion molecules       |
| $1.22 \times 10^{-7}$  | 19            | 172         | Homophilic cell adhesion via plasma membrane adhesion molecules |
| $1.15 \times 10^{-5}$  | 55            | 1412        | Neuron differentiation                                          |
| $6.51 \times 10^{-5}$  | 57            | 1575        | Generation of neurons                                           |
| $8.89 \times 10^{-5}$  | 35            | 762         | Synaptic signaling                                              |

**Table S3. ICD codes for MVP case status.** Classification as a case required at least one inpatient code or two or more outpatient codes for Major Depressive Disorder (MDD). Classification as a control required no record of inpatient or outpatient codes for MDD. Subjects with only one outpatient codes for MDD were excluded from all analyses.

| ICD9  | ICD10  | description                                                                  |
|-------|--------|------------------------------------------------------------------------------|
| 2962  |        | Major depressive disorder, single episode                                    |
| 2963  |        | Major depressive disorder, recurrent episode                                 |
| 29620 | F32.9  | Major depressive disorder, single episode, unspecified                       |
| 29621 | F32.0  | Major depressive disorder, single episode, mild                              |
| 29622 | F32.1  | Major depressive disorder, single episode, moderate                          |
| 29623 | F32.2  | Major depressive disorder, single episode, severe without psychotic features |
| 29624 | F32.3  | Major depressive disorder, single episode, severe with psychotic features    |
| 29625 | F32.4  | Major depressive disorder, single episode, in partial remission              |
| 29626 | F32.5  | Major depressive disorder, single episode, in full remission                 |
| 29630 | F33.9  | Major depressive disorder, recurrent, unspecified                            |
| 29630 | F33.40 | Major depressive disorder, recurrent, in remission, unspecified              |
| 29631 | F33.0  | Major depressive disorder, recurrent, mild                                   |
| 29632 | F33.1  | Major depressive disorder, recurrent, moderate                               |
| 29635 | F33.41 | Major depressive disorder, recurrent, in partial remission                   |
| 29636 | F33.42 | Major depressive disorder, recurrent, in full remission                      |
| 311   | F32.9  | Major depressive disorder, single episode, unspecified                       |
| 29633 | F33.2  | Major depressive disorder, recurrent severe without psychotic features       |
| 29634 | F33.3  | Major depressive disorder, recurrent, severe with psychotic symptoms         |

**Table S4. PHQ-2 Phenotype, adapted from the MVP Baseline Survey**

31. Over the PAST 2 WEEKS, have you been bothered by any of these problems?

|                                             | Not at all               | Several days             | More days than not       | Nearly every day         |
|---------------------------------------------|--------------------------|--------------------------|--------------------------|--------------------------|
| Feeling down, depressed, or hopeless        | <input type="checkbox"/> | <input type="checkbox"/> | <input type="checkbox"/> | <input type="checkbox"/> |
| Little interest or pleasure in doing things | <input type="checkbox"/> | <input type="checkbox"/> | <input type="checkbox"/> | <input type="checkbox"/> |

**Table S5. Progress and History of Depression GWAS**

| Study                           | Cases          | GWS loci   |
|---------------------------------|----------------|------------|
| PGC MDD1                        | 9,240          | 0          |
| Howard Broad Depression         | 127,552        | 14         |
| Hyde 23andMe                    | 75,607         | 15         |
| PGC MDD2                        | 135,458        | 44         |
| PGC Hyde Howard Meta            | 246,363        | 101        |
| FinnGen Mood Disorders          | 10,418         | 0          |
| <b>MVP MDD</b>                  | <b>83,810</b>  | <b>10</b>  |
| <b>MVP African ancestry MDD</b> | <b>25,843</b>  | <b>0</b>   |
| <b>Current Meta (MDD-META)</b>  | <b>340,591</b> | <b>178</b> |
